# Supplementary material
Source: publisher site journal article supplement (https://www.dovepress.com/article/358927)
Supplement: Supplementary file 1 [file get_supplementary_file.php]

## Appendix 1

READ codes for asthma and/or COPD and asthma-COPD overlap in the CPRD.

| Readcodes:       | Description/Read Term                       |
|------------------|---------------------------------------------|
| <b>1. Asthma</b> |                                             |
| H331.00          | Intrinsic Asthma                            |
| H330.11          | Allergic asthma                             |
| H330.12          | Childhood asthma                            |
| H330.13          | Hay fever with asthma                       |
| H330.14          | Pollen asthma                               |
| H33..11          | Bronchial asthma                            |
| H335.00          | Chronic asthma with fixed airflow           |
| H330.00          | Extrinsic (atopic) asthma                   |
| 663V300          | Severe asthma                               |
| H33z100          | Asthma attack                               |
| H330000          | Extrinsic asthma without status asthmaticus |
| 1O2..00          | Asthma confirmed                            |
| H333.00          | Acute exacerbation of asthma                |
| H47y000          | Detergent asthma                            |
| H331111          | Intrinsic asthma with asthma attack         |
| H33..00          | Asthma                                      |
| H33z200          | Late-onset asthma                           |
| H332.00          | Mixed asthma                                |
| H334.00          | Brittle asthma                              |
| H33z111          | Asthma attack NOS                           |
| H312000          | Chronic asthmatic bronchitis                |
| H331100          | Intrinsic asthma with status asthmaticus    |
| H330111          | Extrinsic asthma with asthma attack         |
| 663V100          | Mild asthma                                 |
| H331000          | Intrinsic asthma without status asthmaticus |
| H330100          | Extrinsic asthma with status asthmaticus    |
| H331.11          | Late onset asthma                           |
| H330z00          | Extrinsic asthma NOS                        |
| H35y700          | Wood asthma                                 |
| H331z00          | Intrinsic asthma NOS                        |
| H33z011          | Severe asthma attack                        |

|                               |                                                              |
|-------------------------------|--------------------------------------------------------------|
| H330011                       | Hay fever with asthma                                        |
| <b>2. COPD</b>                |                                                              |
| H36..00                       | Mild chronic obstructive pulmonary disease                   |
| H37..00                       | Moderate chronic obstructive pulmonary disease               |
| H38..00                       | Severe chronic obstructive pulmonary disease                 |
| H3y..11                       | Other specified chronic obstructive pulmonary disease        |
| H39..00                       | Very severe chronic obstructive pulmonary disease            |
| 66YM.00                       | Chronic obstructive pulmonary disease                        |
| Hyu3100                       | [X]Other specified chronic obstructive pulmonary disease     |
| H3...00                       | Chronic obstructive pulmonary disease                        |
| H3z..11                       | Chronic obstructive pulmonary disease NOS                    |
| H3...11                       | Chronic obstructive airways disease NOS                      |
| H3y..00                       | Other specified chronic obstructive airways disease          |
| H312200                       | Chronic obstructive airways disease                          |
| H3A..00                       | End stage chronic obstructive airways disease                |
| H312200                       | Acute exacerbation of chronic obstructive airways disease    |
| <b>3. Asthma-COPD overlap</b> |                                                              |
| H3B..00                       | Asthma-chronic obstructive pulmonary disease overlap syndrom |

Gemscript Codes to identify asthma and/or COPD and asthma-COPD overlap medications in the CPRD.

| <b>Prodcode</b> | <b>Gemscriptcode</b> | <b>Product Name</b>                                                                                        | <b>Drug Substance Name</b>    |
|-----------------|----------------------|------------------------------------------------------------------------------------------------------------|-------------------------------|
| 47638           | 00402021             | Neuvent 25microgram/dose Inhaler CFC (Kent Pharmaceuticals Ltd) salmeterol xinafoate                       | Salmeterol Xinafoate          |
| 35165           | 92979020             | Serevent 50microgram disks with Diskhale (GlaxoSmithKline UK Ltd) Salmeterol xinafoate                     | Salmeterol Xinafoate          |
| 7270            | 90173020             | Salmeterol 25microgram/dose inhaler CFC free salmeterol xinafoate 25microgram/actuation                    | Salmeterol Xinafoate          |
| 549             | 74018020             | Serevent 25microgram/dose inhaler (GlaxoSmithKline UK Ltd) salmeterol xinafoate                            | Salmeterol Xinafoate          |
| 57694           | 16929021             | Vertine 25microgram/dose inhaler CFC free (Teva UK Ltd) salmeterol xinafoate                               | Salmeterol Xinafoate          |
| 2224            | 74020020             | Serevent 50microgram/dose Accuhaler (GlaxoSmithKline UK Ltd) salmeterol xinafoate                          | Salmeterol Xinafoate          |
| 54742           | 4199020              | Salmeterol 25microgram/dose inhaler CFC free (A A H Pharmaceuticals Ltd) salmeterol                        | Salmeterol Xinafoate          |
| 50051           | 21883020             | Serevent 25microgram/dose Evohaler (Waymade Health Care Plc) salmeterol xinafoate                          | Salmeterol Xinafoate          |
| 35825           | 92985020             | Serevent 50microgram disks (GlaxoSmithKline UK Ltd) salmeterol xinafoate 50microgram                       | Salmeterol Xinafoate          |
| 57544           | 02702020             | Serevent 50microgram/dose Accuhaler (Waymade Health Care Plc) salmeterol xinafoate                         | Salmeterol Xinafoate          |
| 719             | 74015020             | Salmeterol 50microgram/dose dry powder inhaler salmeterol xinafoate 50microgram/1 dose                     | Salmeterol Xinafoate          |
| 465             | 74013020             | Salmeterol 25microgram/dose inhaler salmeterol xinafoate 25microgram/1 dose                                | Salmeterol Xinafoate          |
| 35503           | 92977020             | Salmeterol 50microgram inhalation powder blisters salmeterol xinafoate 50microgram                         | Salmeterol Xinafoate          |
| 35542           | 9291020              | 50microgram inhalation powder blisters with device salmeterol xinafoate                                    | Salmeterol Xinafoate          |
| 56478           | 02704020             | Serevent 50microgram/dose Accuhaler (DE Pharmaceuticals) salmeterol xinafoate                              | Salmeterol Xinafoate          |
| 3297            | 74014020             | Salmeterol 50micrograms disk salmeterol xinafoate 50microgram Disc inhalation                              | Salmeterol Xinafoate          |
| 910             | 74019020             | Serevent diskhale 50microgram inhalation powder (Glaxo Welldone UK Ltd) Salmeterol                         | Salmeterol Xinafoate          |
| 37432           | 94307020             | Fostair 100micrograms/dose / 6micrograms/dose inhaler (Chiesi Ltd) Formoterol Fumarate Formoterol fumarate | Formoterol fumarate dihydrate |

|       |          |                                                                                                                                                                             |                               |
|-------|----------|-----------------------------------------------------------------------------------------------------------------------------------------------------------------------------|-------------------------------|
| 6525  | 80413020 | Formoterol 12microgram inhalation powder capsules with device Formoterol Fumarate dihydrate Formoterol fumarate dihydrate 12microgram                                       | Formoterol fumarate dihydrate |
| 66448 | 52510021 | Flutiform 250micrograms/dose / 10micrograms/dose inhaler (Waymade Healthcare Plc)                                                                                           | Formoterol fumarate dihydrate |
| 1975  | 85747020 | Oxis 6 Turbohaler (AstraZeneca UK Ltd) Formoterol fumarate dehydrate 6microgram/1dose inhalation Formoterol fumarate dihydrate 6microgram/1dose Inhalation Oxi              | Formoterol fumarate dihydrate |
| 66547 | 02723020 | Oxis 12 Turbohaler (DE Pharmaceuticals) Formoterol fumarate dehydrate 12microgram/1dose Formoterol fumarate dihydrate 12microgram/1dose                                     | Formoterol fumarate dihydrate |
| 35725 | 92823020 | Formoterol Easyhaler 12micrograms/dose dry powder inhaler (Orion Pharma (UK) Ltd)                                                                                           | Formoterol fumarate dihydrate |
| 10968 | 80411020 | Foradil 12microgram inhalation powder capsules with device (Novartis Pharmaceuticals UK Ltd) Formoterol                                                                     | Formoterol fumarate dihydrate |
| 57558 | 02718020 | Oxis 6 Turbohaler (Lexon (UK) Ltd) Formoterol fumarate dihydrate 6microgram/1dose Inhalation powder                                                                         | Formoterol fumarate dihydrate |
| 62535 | 44185021 | Duaklir 340micrograms/dose / 12micrograms/dose Genuair (AstraZeneca UK Ltd) Formoterol fumarate                                                                             | Formoterol fumarate dihydrate |
| 7133  | 85743020 | Formoterol 12micrograms/dose dry powder inhaler Formoterol dihydrate 12microgram/1dose Formoterol fumarate dihydrate 12microgram/1dose                                      | Formoterol fumarate dihydrate |
| 67238 | 32398020 | Foradil 12microgram inhalation powder capsules with device (Sigma Pharmaceuticals Plc) Formoterol fumarate                                                                  | Formoterol fumarate dihydrate |
| 1974  | 85749020 | Oxis 12 Turbohaler (AstraZeneca UK Ltd) Formoterol fumarate dehydrate 12microgram/1dose inhalation powder Formoterol fumarate dihydrate 12microgram/1dose Inhalation powder | Formoterol fumarate dihydrate |
| 9711  | 85742020 | Formoterol 6micrograms/dose dry powder inhaler Formoterol fumarate dihydrate 6microgram/1dose Inhalation powder Inhalation                                                  | Formoterol fumarate dihydrate |
| 25784 | 89766020 | Atimos Modulite 12micrograms/dose inhaler (Chiesi Ltd) Formoterol fumarate dihydrate 12microgram/1dose Pressurised inhalation Inhalation                                    | Formoterol fumarate dihydrate |
| 14306 | 89764020 | Formoterol 12micrograms/dose inhaler CFC free Formoterol Fumarate Dihydrate 12micrograms/actuation Inhaler Cfc-free Inhalation                                              | Formoterol fumarate dihydrate |
| 56482 | 02721020 | Oxis 12 Turbohaler (Waymade Healthcare Plc) Formoterol fumarate dihydrate 12microgram/1dose Inhalation powder                                                               | Formoterol fumarate dihydrate |

|       |          |                                                                                                                                                  |                    |
|-------|----------|--------------------------------------------------------------------------------------------------------------------------------------------------|--------------------|
| 1957  | 52235020 | Ventolin 5mg Nebules (GlaxoSmithKline UK Ltd)<br>Salbutamol sulfate 2mg/1ml Nebuliser liquid Inhalation<br>Selective Beta 2 Agonists             | Salbutamol sulfate |
| 16577 | 88298020 | Easyhaler Salbutamol sulfate 200micrograms/dose dry<br>powder inhaler (Orion Pharma (UK) Ltd) Salbutamol<br>200microgram/1dose Inhalation powder | Salbutamol sulfate |
| 42830 | 98212020 | Ventolin 100micrograms/dose Evohaler (GlaxoSmithKline<br>UK Ltd) Salbutamol sulfate 100microgram/1dose<br>Pressurised inhalation                 | Salbutamol sulfate |
| 48741 | 02651020 | Ventolin 100micrograms/dose Evohaler (Mawdsley-Brooks<br>& Company Ltd) Salbutamol sulfate 100microgram/1dose<br>Pressurised inhalation          | Salbutamol sulfate |
| 882   | 67866020 | Salbutamol 200microgram inhalation powder capsules<br>Salbutamol sulfate 200microgram Inhalation powder                                          | Salbutamol sulfate |
| 30212 | 53424020 | Salbutamol cyclohaler Salbutamol Sulphate Cyclohaler                                                                                             | Salbutamol sulfate |
| 8     | 59553020 | Salbutamol 100microgram/1dose Pressurised inhalation                                                                                             | Salbutamol sulfate |
| 510   | 52229020 | Ventolin 5mg/ml respirator solution (GlaxoSmithKline UK<br>Ltd) 5mg/1ml Nebuliser liquid                                                         | Salbutamol sulfate |
| 49591 | 02653020 | Salbutamol 100micrograms/dose inhaler CFC free (Sandoz<br>Ltd) Salbutamol sulfate 100microgram/1dose Pressurised<br>inhalation                   | Salbutamol sulfate |
| 5753  | 69628020 | Salbutamol 400micrograms disc Salbutamol Sulphate<br>400micrograms Disc Inhalation                                                               | Salbutamol sulfate |
| 34311 | 50518020 | Salbutamol 100microgram/inhalation Inhalation powder<br>(Berk Pharmaceuticals Ltd) Salbutamol                                                    | Salbutamol sulfate |
| 1741  | 86841020 | Salbutamol 100micrograms/dose breath actuated inhaler<br>CFC free Salbutamol sulfate                                                             | Salbutamol sulfate |
| 7935  | 70528020 | Maxivent 100microgram/inhalation Inhalation powder<br>(Ashbourne Pharmaceuticals Ltd)                                                            | Salbutamol sulfate |
| 3443  | 81503020 | Salbutamol 100microgram/inhalation Spacehaler (Celltech<br>Pharma Europe Ltd)                                                                    | Salbutamol sulfate |
| 34162 | 59498020 | Salbutamol 2.5mg/2.5ml Nebuliser liquid (Galen Ltd)                                                                                              | Salbutamol sulfate |
| 53297 | 02658020 | Ventolin 200micrograms/dose Accuhaler (Sigma<br>Pharmaceuticals Plc)                                                                             | Salbutamol sulfate |
| 31    | 52213020 | Ventolin 100microgram/inhalation Inhalation powder<br>(Glaxo Wellcome UK Ltd)                                                                    | Salbutamol sulfate |
| 48742 | 02645020 | Ventodisks 400microgram (GlaxoSmithKline UK Ltd)                                                                                                 | Salbutamol sulfate |
| 942   | 68159020 | Aerolin 100micrograms/dose Autohaler (3M Health Care<br>Ltd)                                                                                     | Salbutamol sulfate |

|       |          |                                                                                                                   |                    |
|-------|----------|-------------------------------------------------------------------------------------------------------------------|--------------------|
| 3163  | 69627020 | Salbutamol 200micrograms disc Salbutamol Sulphate<br>200micrograms Disc Inhalation                                | Salbutamol sulfata |
| 5889  | 79551020 | Salamol 100microgram/inhalation Inhalation powder (Kent<br>Pharmaceuticals Ltd)                                   | Salbutamol sulfata |
| 9651  | 85793020 | Asmasal 100microgram/inhalation Spacehaler (Celltech<br>Pharma Europe Ltd)                                        | Salbutamol sulfata |
| 17    | 59554020 | Salbutamol 100micrograms/dose inhaler CFC free<br>Salbutamol sulfata 100microgram/1dose Pressurised<br>inhalation | Salbutamol sulfata |
| 5170  | 81157020 | Salamol 100micrograms/dose inhaler CFC free (Teva UK<br>Ltd)                                                      | Salbutamol sulfata |
| 1950  | 68215020 | Ventodisks 400microgram/blister Disc (Allen & Hanburys<br>Ltd)                                                    | Salbutamol sulfata |
| 66793 | 69338020 | Salbutamol rondo 100micrograms/actuation inhaler and<br>spacer                                                    | Salbutamol sulfata |
| 14525 | 80501020 | Salbutamol 100micrograms/inhalation vortex inhaler                                                                | Salbutamol sulfata |
| 22512 | !6452101 | SALBUTAMOL Inhaler                                                                                                | Salbutamol sulfata |
| 30118 | 61514020 | Salbutamol 100micrograms/dose inhaler CFC free (Teva<br>UK Ltd)                                                   | Salbutamol sulfata |
| 49370 | 02643020 | Ventodisks 200microgram (GlaxoSmithKline UK Ltd)                                                                  | Salbutamol sulfata |
| 1882  | 68214020 | Ventodisks 200microgram/blister Disc (Allen & Hanburys<br>Ltd)                                                    | Salbutamol sulfata |
| 58269 | 16419021 | AirSalb 100micrograms/dose inhaler CFC free (Sandoz Ltd)                                                          | Salbutamol sulfata |
| 50315 | 02638020 | Salbutamol 200microgram inhalation powder blisters with<br>device Salbutamol sulfata                              | Salbutamol sulfata |
| 30240 | 68160020 | Aerolin autohaler 100microgram/actuation Pressurised<br>inhalation (3M Health Care Ltd)                           | Salbutamol sulfata |
| 20675 | !9131025 | SALBUTAMOL ROTAHALER COMPLETE UNIT                                                                                | Salbutamol sulfata |
| 27793 | 70349020 | Salbutamol cyclohaler type 5 insufflator Inhalation powder<br>(Bristol-Myers Squibb Pharmaceuticals Ltd)          | Salbutamol sulfata |
| 50503 | 02659020 | Ventolin 200micrograms/dose Accuhaler (Mawdsley-<br>Brooks & Company Ltd)                                         | Salbutamol sulfata |
| 33817 | 63650020 | Salbutamol 100micrograms/dose inhaler CFC free (Actavis<br>UK Ltd) Salbutamol sulfata                             | Salbutamol sulfata |
| 66395 | 57278021 | Salbutamol 100micrograms/dose inhaler CFC free<br>(Mawdsley-Brooks & Company Ltd)                                 | Salbutamol sulfata |
| 22430 | 84022020 | Spacehaler salbutamol 100microgram/inhalation Spacehaler<br>(Celltech Pharma Europe Ltd)                          | Salbutamol sulfata |
| 34702 | 50525020 | Salbutamol 100microgram/inhalation Inhalation powder(C<br>P Pharmaceuticals Ltd)                                  | Salbutamol sulfata |

|        |          |                                                                                              |                    |
|--------|----------|----------------------------------------------------------------------------------------------|--------------------|
| 60923  | 02661020 | Salamol 100micrograms/dose Easi-Breathe inhaler (DE Pharmaceuticals)                         | Salbutamol sulfate |
| 25218  | !8504810 | SALBUTAMOL CFC/FREE B/A                                                                      | Salbutamol sulfate |
| 48809  | 02641020 | Ventodisks 400microgram with Diskhaler (GlaxoSmithKline UK Ltd)                              | Salbutamol sulfate |
| 34310  | 61776020 | Salbutamol 100micrograms/dose inhaler CFC free (A A H Pharmaceuticals Ltd)                   | Salbutamol sulfate |
| 64801  | 02646020 | Salbutamol 100micrograms/dose inhaler CFC free (Mylan Ltd)                                   | Salbutamol sulfate |
| 113181 | 88296020 | Easyhaler Salbutamol sulfate 100micrograms/dose dry powder inhaler (Orion Pharma (UK) Ltd)   | Salbutamol sulfate |
| 33373  | 63926020 | Salbutamol 200 Cyclocaps (Teva UK Ltd) Salbutamol sulfate                                    | Salbutamol sulfate |
| 898    | 52215020 | Ventolin evohaler 100 100microgram/inhalation Pressurised inhalation (Glaxo Wellcome UK Ltd) | Salbutamol sulfate |
| 44713  | 50537020 | Salbutamol 100microgram/inhalation Inhalation powder (Celltech Pharma Europe Ltd)            | Salbutamol sulfate |
| 5740   | 79575020 | Airomir 100micrograms/dose Autohaler (Teva UK Ltd)                                           | Salbutamol sulfate |
| 5516   | 79690020 | Salamol 100micrograms/dose Easi-Breathe inhaler (Teva UK Ltd)                                | Salbutamol sulfate |
| 67040  | 02647020 | Salbutamol 100micrograms/dose inhaler CFC free (Alliance Healthcare (Distribution) Ltd)      | Salbutamol sulfate |
| 38079  | 94863020 | Salbutamol 100micrograms/dose dry powder inhalation cartridge with device                    | Salbutamol sulfate |
| 30230  | 79713020 | Salbutamol 100micrograms/actuation breath actuated inhaler                                   | Salbutamol sulfate |
| 2978   | 69894020 | Salbutamol 200micrograms/dose dry powder inhaler                                             | Salbutamol sulfate |
| 52543  | 02644020 | Salbutamol 400microgram inhalation powder blisters                                           | Salbutamol sulfate |
| 1952   | 52219020 | Ventolin 400microgram Rotacaps (GlaxoSmithKline UK Ltd)                                      | Salbutamol sulfate |
| 49368  | 02639020 | Ventodisks 200microgram with Diskhaler (GlaxoSmithKline UK Ltd)                              | Salbutamol sulfate |
| 958    | 84965020 | Ventolin easi-breathe 100microgram/actuation Pressurised inhalation (Allen & Hanburys Ltd)   | Salbutamol sulfate |
| 34134  | 68156020 | Aerolin 400 100microgram/actuation Inhalation powder (3M Health Care Ltd)                    | Salbutamol sulfate |
| 31933  | 50543020 | Salbutamol 100micrograms/dose inhaler (A A H Pharmaceuticals Ltd)                            | Salbutamol sulfate |

|       |          |                                                                                                  |                    |
|-------|----------|--------------------------------------------------------------------------------------------------|--------------------|
| 48519 | 02648020 | Ventolin 100micrograms/dose Evohaler (Waymade Healthcare Plc)                                    | Salbutamol sulfate |
| 40655 | 69361020 | Salbuvent 100microgram/actuation Inhalation powder (Pharmacia Ltd)                               | Salbutamol sulfate |
| 42858 | 98214020 | Ventolin 200micrograms/dose Accuhaler (GlaxoSmithKline UK Ltd) Salbutamol                        | Salbutamol sulfate |
| 13038 | 83865020 | Pulvinal Salbutamol 200micrograms/dose dry powder inhaler (Chiesi Ltd)                           | Salbutamol sulfate |
| 28508 | 54287020 | Salbutamol 100microgram/inhalation Inhalation powder (IVAX Pharmaceuticals UK Ltd)               | Salbutamol sulfate |
| 2850  | 67867020 | Salbutamol 400microgram inhalation powder capsules                                               | Salbutamol sulfate |
| 7017  | 88294020 | Salbutamol 100micrograms/dose dry powder inhaler                                                 | Salbutamol sulfate |
| 66924 | 53356021 | Salbutamol 100micrograms/dose inhaler CFC free (DE Pharmaceuticals)                              | Salbutamol sulfate |
| 66972 | 15632021 | Salbutamol 100micrograms/dose inhaler CFC free (AM Distributions (Yorkshire) Ltd)                | Salbutamol sulfate |
| 38214 | 94865020 | Salbutamol 100micrograms/dose dry powder inhalation cartridge                                    | Salbutamol sulfate |
| 48490 | 02650020 | Ventolin 100micrograms/dose Evohaler (DE Pharmaceuticals)                                        | Salbutamol sulfate |
| 38097 | 56098020 | Salbutamol cyclocaps 200microgram Inhalation powder (DuPont Pharmaceuticals Ltd)                 | Salbutamol sulfate |
| 46551 | 77674020 | Salbutamol 100microgram/inhalation Inhalation powder (Neo Laboratories Ltd)                      | Salbutamol sulfate |
| 4497  | 52214020 | Ventolin accuhaler 200 200microgram/actuation Inhalation powder (Glaxo Wellcome UK Ltd)          | Salbutamol sulfate |
| 13996 | 86269020 | Salamol 100microgram/inhalation Inhalation powder (Sandoz Ltd)                                   | Salbutamol sulfate |
| 4665  | 84485020 | Salbulin 100micrograms/dose inhaler (3M Health Care Ltd)                                         | Salbutamol sulfate |
| 38416 | 56099020 | Salbutamol cyclocaps 400microgram Inhalation powder (DuPont Pharmaceuticals Ltd)                 | Salbutamol sulfate |
| 49369 | 02642020 | Salbutamol 200microgram inhalation powder blisters                                               | Salbutamol sulfate |
| 957   | 79689020 | Salamol easi-breathe 100microgram/actuation Pressurised inhalation (IVAX Pharmaceuticals UK Ltd) | Salbutamol sulfate |
| 34619 | 62351020 | Salbutamol 100microgram/inhalation Inhalation powder (Kent Pharmaceuticals Ltd)                  | Salbutamol sulfate |
| 34029 | 53423020 | Salbutamol 400micrograms inahalation capsules                                                    | Salbutamol sulfate |
| 48547 | 41350020 | Salamol 100micrograms/dose inhaler CFC free (Arrow Generics Ltd)                                 | Salbutamol sulfate |



|       |          |                                                                                           |                    |
|-------|----------|-------------------------------------------------------------------------------------------|--------------------|
| 38226 | 94869020 | Salbulin Novolizer 100micrograms/dose inhalation powder refill (Meda Pharmaceuticals Ltd) | Salbutamol sulfate |
| 38136 | 94867020 | Salbulin Novolizer 100micrograms/dose inhalation powder (Meda Pharmaceuticals Ltd)        | Salbutamol sulfate |
| 61591 | 02652020 | Salbutamol 100micrograms/dose inhaler CFC free (Phoenix Healthcare Distribution Ltd)      | Salbutamol sulfate |
| 57524 | 02655020 | Ventolin 200micrograms/dose Accuhaler (Dowelhurst Ltd)                                    | Salbutamol sulfate |
| 2851  | 52218020 | Ventolin 200microgram Rotacaps (GlaxoSmithKline UK Ltd)                                   | Salbutamol sulfate |
| 33089 | 63418020 | Salbutamol 100micrograms/dose inhaler (Kent Pharmaceuticals Ltd)                          | Salbutamol sulfate |
| 52799 | 02640020 | Salbutamol 400microgram inhalation powder blisters with device                            | Salbutamol sulfate |
| 32050 | 63930020 | Salbutamol 400 Cyclocaps (Teva UK Ltd)                                                    | Salbutamol sulfate |
| 1087  | 86061020 | Asmasal 95micrograms/dose Clickhaler (Focus Pharmaceuticals Ltd)                          | Salbutamol sulfate |
| 2655  | 79415020 | Airomir 100micrograms/dose inhaler (Teva UK Ltd)                                          | Salbutamol sulfate |
| 31082 | 70320020 | Salbuvent 5mg/ml Respirator solution (Pharmacia Ltd)                                      | Salbutamol sulfate |
| 1698  | 69893020 | Salbutamol 100micrograms/dose breath actuated inhaler                                     | Salbutamol sulfate |
| 57249 | 02654020 | Asmavent 100micrograms/dose inhaler CFC free (Kent Pharmaceuticals Ltd)                   | Salbutamol sulfate |
| 6462  | 69895020 | Salbutamol 95micrograms/dose dry powder inhalerSalbutamol sulfate                         | Salbutamol sulfate |
| 50956 | 02657020 | Ventolin 200micrograms/dose Accuhaler (DE Pharmaceuticals)                                | Salbutamol sulfate |
| 862   | 52877020 | Salbulin Inhalation powder (3M Health Care Ltd)Salbutamol                                 | Salbutamol sulfate |
| 59409 | 47210020 | Salbutamol 100micrograms/dose inhaler CFC free (Waymade Healthcare Plc)                   | Salbutamol sulfate |
| 50557 | 39799020 | Ventolin 200micrograms/dose Accuhaler (Lexon (UK) Ltd)                                    | Salbutamol sulfate |
| 21859 | 57680020 | Asmaven 100microgram Inhalation powder (Berk Pharmaceuticals Ltd)                         | Salbutamol sulfate |
| 1093  | 52885020 | Salamol 100microgram/actuation Inhalation powder (IVAX Pharmaceuticals UK Ltd)            | Salbutamol sulfate |
| 28577 | 52223020 | Ventolin 50microgram/ml Injection (Allen & Hanburys Ltd)                                  | Salbutamol sulfate |
| 33588 | 60625020 | Salbutamol 100micrograms/dose inhaler (Mylan Ltd)                                         | Salbutamol sulfate |
| 30204 | 53422020 | Salbutamol 200micrograms inahalation capsules                                             | Salbutamol sulfate |

|       |          |                                                                              |                         |
|-------|----------|------------------------------------------------------------------------------|-------------------------|
| 7711  | 66883020 | Terbutaline 250micrograms/dose inhaler with spacer                           | Terbutaline sulfate     |
| 235   | 48447020 | Bricanyl 250micrograms/dose inhaler (AstraZeneca UK Ltd)                     | Terbutaline sulfate     |
| 42886 | 98210020 | Bricanyl 500micrograms/dose Turbohaler (AstraZeneca UK Ltd)                  | Terbutaline sulfate     |
| 3763  | 03195007 | TERBUTALINE RESPULES INH                                                     | Terbutaline sulfate     |
| 2758  | 58865020 | Bricanyl Refill canister (AstraZeneca UK Ltd)                                | Terbutaline sulfate     |
| 67326 | 02685020 | Bricanyl 500micrograms/dose Turbohaler (DE Pharmaceuticals)                  | Terbutaline sulfate     |
| 67543 | 02682020 | Bricanyl 500micrograms/dose Turbohaler (Waymade Healthcare Plc)              | Terbutaline sulfate     |
| 1619  | 74122020 | Terbutaline 500micrograms/dose dry powder inhaler                            | Terbutaline sulfate     |
| 1628  | 66884020 | Terbutaline 250micrograms/actuation refill canister                          | Terbutaline sulfate     |
| 1620  | 66882020 | Terbutaline 250micrograms/dose inhaler                                       | Terbutaline sulfate     |
| 907   | 48448020 | Bricanyl turbohaler 500 500microgram Turbohaler (AstraZeneca UK Ltd)         | Terbutaline sulfate     |
| 52410 | 02688020 | Bricanyl 500micrograms/dose Turbohaler (Necessity Supplies Ltd)              | Terbutaline sulfate     |
| 7954  | 48449020 | Bricanyl 250micrograms/dose spacer inhaler (AstraZeneca UK Ltd)              | Terbutaline sulfate     |
| 1794  | 48393020 | Berotec 100microgram/actuation Inhalation powder (Boehringer Ingelheim Ltd)  | Fenoterol hydrobromide  |
| 4842  | 61821020 | Fenoterol 100microgram/actuation inhaler                                     | Fenoterol hydrobromide  |
| 2020  | 48391020 | Berotec 200micrograms/dose inhaler (Boehringer Ingelheim Ltd)                | Fenoterol hydrobromide  |
| 5185  | 61819020 | Fenoterol 200micrograms/dose inhaler                                         | Fenoterol hydrobromide  |
| 8572  | 66535020 | Rimiterol inhaler                                                            | Rimiterol hydrobromide  |
| 10858 | 52870020 | Pulmadil auto Inhalation powder (3M Health Care Ltd)                         | Rimiterol hydrobromide  |
| 12563 | 53826020 | Exirel Inhalation powder (3M Health Care Ltd)                                | Pirbuterol              |
| 16236 | 72193020 | Pirbuterol acetate inhaler                                                   | Pirbuterol              |
| 12486 | 48475020 | Bronchodil 500microgram/dose Inhalation powder (Viatris Pharmaceuticals Ltd) | Reproterol hydrobromide |
| 15165 | 66477020 | Reproterol 500micrograms/dose inhaler                                        | Reproterol hydrobromide |
| 8508  | 48103020 | Alupent 750microgram/inhalation Inhalation powder (Boehringer Ingelheim Ltd) | Orciprenaline sulfate   |
| 8151  | 72219020 | Orciprenaline 750micrograms/inhalation Aerosol refill                        | Orciprenaline sulfate   |

|       |          |                                                                                                                                                                                                                                   |                       |
|-------|----------|-----------------------------------------------------------------------------------------------------------------------------------------------------------------------------------------------------------------------------------|-----------------------|
| 8149  | 48107020 | Alupent 750microgram/inhalation Aerosol refill (Boehringer Ingelheim Ltd)                                                                                                                                                         | Orciprenaline sulfate |
| 461   | 72218020 | Orciprenaline 750micrograms/inhalation inhaler                                                                                                                                                                                    | Orciprenaline sulfate |
| 1959  | 65884020 | Pulmicort 0.5mg Respules (AstraZeneca UK Ltd)<br>Budesonide 250microgram/1ml Nebuliser liquid inhalation<br>Inhalation 250microgram/1ml Nebuliser liquid                                                                          | Budesonide            |
| 49711 | 02876020 | Pulmicort 200micrograms/dose inhaler (AstraZeneca UK Ltd) Budesonide 200microgram/1dose Pressurised inhalation Inhalation                                                                                                         | Budesonide            |
| 454   | 53685020 | Pulmicort 200micrograms/dose inhaler (AstraZeneca UK Ltd) Budesonide 200microgram/1dose Pressurised inhalation Inhalation Budesonide 200microgram/1dose Pressurised inhalation Inhalation                                         | Budesonide            |
| 17670 | 90421020 | Easyhaler Budesonide 100micrograms/dose dry powder inhaler (Orion Pharma (UK) Ltd) Budesonide 100microgram/1dose Inhalation powder Inhalation                                                                                     | Budesonide            |
| 56498 | 02858020 | Pulmicort 200 Turbohaler (Waymade Healthcare Plc) Budesonide 200microgram/1dose Inhalation powderInhalation Budesonide 200microgram/1dose Inhalation powder Inhalation                                                            | Budesonide            |
| 1642  | 52570020 | Budesonide 400micrograms/dose dry powder inhaler Budesonide                                                                                                                                                                       | Budesonide            |
| 35510 | 92711020 | Budesonide 200micrograms/dose dry powder inhalation cartridge with device                                                                                                                                                         | Budesonide            |
| 909   | 64256020 | Budesonide 200micrograms/dose inhaler Budesonide200microgram/1dose Pressurised inhalation                                                                                                                                         | Budesonide            |
| 2092  | 52569020 | Budesonide 200micrograms/dose dry powder inhalerBudesonide                                                                                                                                                                        | Budesonide            |
| 8433  | 64258020 | Budesonide 100micrograms/actuation inhaler Budesonide 100micrograms/actuation Aerosol Inhaler                                                                                                                                     | Budesonide            |
| 67239 | 02867020 | Pulmicort 400 Turbohaler (Waymade Healthcare Plc) Budesonide 400microgram/1dose Inhalation powderInhalation Budesonide 400microgram/1dose Inhalation powder Inhalation Budesonide 400microgram/1dose Inhalation powder Inhalation | Budesonide            |
| 3570  | 73584020 | Budesonide 200micrograms/actuation refill canister Budesonide 200micrograms/actuation Refill Canister Inhalation                                                                                                                  | Budesonide            |

|       |          |                                                                                                                                                                |            |
|-------|----------|----------------------------------------------------------------------------------------------------------------------------------------------------------------|------------|
| 16054 | 87972020 | Budesonide 200micrograms/actuation breath actuated powder inhaler Budesonide 200micrograms/actuation Breath Actuated Dry Powder Inhaler Inhalation             | Budesonide |
| 39879 | 96157020 | Budesonide 200micrograms/dose inhaler CFC free Budesonide 200microgram/1dose Pressurised inhalation Inhalation                                                 | Budesonide |
| 908   | 73579020 | Pulmicort 400 Turbohaler (AstraZeneca UK Ltd) Budesonide 400microgram/1dose Inhalation powder Inhalation 03020000 Corticosteroids (for Respiratory Conditions) | Budesonide |
| 35724 | 92729020 | Budelin Novolizer 200micrograms/dose inhalation powder refill (Meda Pharmaceuticals Ltd)                                                                       | Budesonide |
| 39099 | 96231020 | Pulmicort 100micrograms/dose inhaler CFC free (AstraZeneca UK Ltd) Budesonide 100microgram/1dose Pressurised inhalation                                        | Budesonide |
| 18537 | 86508020 | Budesonide 200microgram inhalation powder capsules Budesonide 200microgram                                                                                     | Budesonide |
| 7788  | 52571020 | Budesonide 100micrograms/dose dry powder inhaler Budesonide 100microgram/1dose Inhalation powder Inhalation                                                    | Budesonide |
| 67322 | 02850020 | Pulmicort 100 Turbohaler (Waymade Healthcare Plc)Budesonide 100microgram/1dose Inhalation powder Inhalation                                                    | Budesonide |
| 14700 | 73583020 | Budesonide 400micrograms/actuation inhaler Budesonide 400micrograms/actuation Aerosol Inhaler                                                                  | Budesonide |
| 35631 | 92727020 | Budelin Novolizer 200micrograms/dose inhalation powder (Meda Pharmaceuticals Ltd)Budesonide 200microgram/1dose Inhalation powder                               | Budesonide |
| 960   | 73580020 | Pulmicort 100 Turbohaler (AstraZeneca UK Ltd)Budesonide 100microgram/1dose Inhalation powder                                                                   | Budesonide |
| 23741 | 87974020 | Novolizer budesonide 200microgram/actuation Pressurised inhalation (Meda Pharmaceuticals Ltd)                                                                  | Budesonide |
| 35602 | 92719020 | Budesonide 200micrograms/dose dry powder inhalation cartridge Budesonide 200micrograms Dry Powder Inhalation Cartridge(refill)                                 | Budesonide |
| 959   | 64257020 | Budesonide 50micrograms/dose inhaler Budesonide 50microgram/1dose Pressurised inhalation                                                                       | Budesonide |
| 60937 | 02859020 | Pulmicort 200 Turbohaler (Dowelhurst Ltd)Budesonide 200microgram/1dose Inhalation powder                                                                       | Budesonide |

|       |          |                                                                                                                             |                        |
|-------|----------|-----------------------------------------------------------------------------------------------------------------------------|------------------------|
| 40057 | 96233020 | Pulmicort 200micrograms/dose inhaler CFC free(AstraZeneca UK Ltd) Budesonide 200microgram/1dose Pressurised inhalation      | Budesonide             |
| 27188 | 90423020 | Easyhaler Budesonide 200micrograms/dose dry powder inhaler (Orion Pharma (UK) Ltd) Budesonide 200microgram/1dose Inhalation | Budesonide             |
| 947   | 73585020 | Budesonide 50micrograms/actuation refill canister Budesonide 50micrograms/actuation Refill Canister                         | Budesonide             |
| 10321 | 84348020 | Budesonide 400microgram inhalation powder capsules Budesonide 400microgram                                                  | Budesonide             |
| 30649 | 90425020 | Easyhaler Budesonide 400micrograms/dose dry powder inhaler (Orion Pharma (UK) Ltd) Budesonide                               | Budesonide             |
| 67315 | 02866020 | Budesonide 400micrograms/dose Turbohaler (Waymade Healthcare Plc                                                            | Budesonide             |
| 956   | 73578020 | Pulmicort 200 Turbohaler (AstraZeneca UK Ltd)Budesonide                                                                     | Budesonide             |
| 2125  | 53686020 | Pulmicort 200microgram Refill canister(AstraZeneca UK Ltd) Budesonide                                                       | Budesonide             |
| 4545  | 53691020 | Pulmicort LS 50microgram Refill canister (AstraZeneca UK Ltd) Budesonide 50microgram                                        | Budesonide             |
| 39102 | 96155020 | Budesonide 100micrograms/dose inhaler CFC free Budesonide 100micrograms                                                     | Budesonide             |
| 1680  | 53690020 | Pulmicort LS 50micrograms/dose inhaler(AstraZeneca UK Ltd) Budesonide                                                       | Budesonide             |
| 37447 | 93259020 | Fluticasone propionate 50microgram inhalation powder blisters Fluticasone propionate                                        | Fluticasone Propionate |
| 1518  | 74986020 | Flixotide 50microgram/actuation Inhalation powder(Allen & Hanburys Ltd)Fluticasone Propionate                               | Fluticasone Propionate |
| 4131  | 74459020 | Fluticasone 100microgram Disc Fluticasone Propionate 100microgram Disc                                                      | Fluticasone Propionate |
| 7638  | 74460020 | Fluticasone 250microgram Disc Fluticasone Propionate 250microgram Disc Inhalation                                           | Fluticasone Propionate |
| 4688  | 74991020 | Fluticasone 50microgram/actuation Pressurised inhalation Fluticasone Propionate                                             | Fluticasone Propionate |
| 7948  | 79604020 | Fluticasone propionate 250micrograms/dose dry powder inhaler                                                                | Fluticasone Propionate |
| 5975  | 76450020 | Fluticasone 125micrograms/dose inhaler CFC free Fluticasone propionate                                                      | Fluticasone Propionate |
| 36021 | 93257020 | Fluticasone propionate 50microgram inhalation powder blisters with device                                                   | Fluticasone Propionate |

|       |          |                                                                                                                           |                        |
|-------|----------|---------------------------------------------------------------------------------------------------------------------------|------------------------|
| 911   | 79577020 | Flixotide accuhaler 250 250microgram/inhalation Inhalation powder (Allen & Hanburys Ltd)                                  | Fluticasone Propionate |
| 9164  | 75180020 | Fluticasone propionate 50micrograms/dose dry powder inhaler Fluticasone propionate                                        | Fluticasone Propionate |
| 42994 | 98222020 | Flixotide 250micrograms/dose Accuhaler (GlaxoSmithKline UK Ltd)                                                           | Fluticasone Propionate |
| 42928 | 98218020 | Flixotide 100micrograms/dose Accuhaler (GlaxoSmithKline UK Ltd)                                                           | Fluticasone Propionate |
| 35905 | 93287020 | Fluticasone propionate 250microgram inhalation powder blisters Fluticasone propionate                                     | Fluticasone Propionate |
| 35986 | 93265020 | Flixotide 50microgram disks (GlaxoSmithKline UK Ltd) Fluticasone propionate 50microgram Inhalation powder 4132            | Fluticasone Propionate |
| 4132  | 74992020 | Fluticasone 125microgram/actuation Pressurised inhalation Fluticasone Propionate                                          | Fluticasone Propionate |
| 42985 | 98216020 | Flixotide 50micrograms/dose Accuhaler(GlaxoSmithKline UK Ltd) Fluticasone propionate 50microgram/1dose Inhalation powder  | Fluticasone Propionate |
| 35392 | 93297020 | Flixotide 500microgram disks with Diskhaler(GlaxoSmithKline UK Ltd) Fluticasone propionate 500microgram Inhalation powder | Fluticasone Propionate |
| 35374 | 93299020 | Flixotide 500microgram disks (GlaxoSmithKline UK Ltd) Fluticasone propionate                                              | Fluticasone Propionate |
| 5718  | 78907020 | Flixotide 125micrograms/dose Evohaler (GlaxoSmithKline UK Ltd)                                                            | Fluticasone Propionate |
| 36290 | 93263020 | Flixotide 50microgram disks with Diskhaler (GlaxoSmithKline UK Ltd) Fluticasone propionate                                | Fluticasone Propionate |
| 2282  | 79605020 | Fluticasone propionate 500micrograms/dose dry powder inhaler                                                              | Fluticasone Propionate |
| 56484 | 02904020 | Flixotide 250micrograms/dose Accuhaler (Waymade Healthcare Plc) Fluticasone propionate                                    | Fluticasone Propionate |
| 7602  | 74458020 | Fluticasone 50microgram Disc Fluticasone Propionate                                                                       | Fluticasone Propionate |
| 36462 | 93295020 | Fluticasone propionate 500microgram inhalation powder blisters Fluticasone propionate                                     | Fluticasone Propionate |
| 5885  | 75181020 | Fluticasone propionate 100micrograms/dose dry powder inhaler Fluticasone propionate                                       | Fluticasone Propionate |
| 53057 | 02951020 | Flixotide 50micrograms/dose Evohaler (Lexon (UK) Ltd)                                                                     | Fluticasone Propionate |
| 57525 | 02909020 | Flixotide 250micrograms/dose Accuhaler (Stephar (U.K.) Ltd) Fluticasone propionate                                        | Fluticasone Propionate |

|       |          |                                                                                                                                                                                                              |                        |
|-------|----------|--------------------------------------------------------------------------------------------------------------------------------------------------------------------------------------------------------------|------------------------|
| 1424  | 74455020 | Flixotide 250microgram Disc (Allen & Hanburys Ltd)<br>Fluticasone Propionate                                                                                                                                 | Fluticasone Propionate |
| 56499 | 02912020 | Flixotide 500micrograms/dose Accuhaler (Waymade<br>Healthcare Plc) Fluticasone propionate<br>500microgram/1dose                                                                                              | Fluticasone Propionate |
| 5309  | 78909020 | Flixotide 50micrograms/dose Evohaler (GlaxoSmithKline<br>UK Ltd)                                                                                                                                             | Fluticasone Propionate |
| 35700 | 93293020 | Fluticasone propionate 500microgram inhalation powder<br>blisters with device                                                                                                                                | Fluticasone Propionate |
| 1426  | 75187020 | Flixotide 500microgram Disc(Allen & Hanburys Ltd)<br>Fluticasone Propionate 500microgram Disc Inhalation                                                                                                     | Fluticasone Propionate |
| 57555 | 02930020 | Flixotide 125micrograms/dose Evohaler (Dowelhurst Ltd)<br>Fluticasone propionate 125microgram/1dose Pressurised<br>inhalation                                                                                | Fluticasone Propionate |
| 2951  | 75179020 | Fluticasone 250microgram/actuation Pressurised inhalation<br>Fluticasone Propionate                                                                                                                          | Fluticasone Propionate |
| 8635  | 74453020 | Flixotide 50microgram Disc (Allen & Hanburys Ltd)<br>Fluticasone Propionate 50microgram Disc Inhalation                                                                                                      | Fluticasone Propionate |
| 1676  | 74987020 | Flixotide 125microgram/actuation Inhalation powder (Allen<br>& Hanburys Ltd) Fluticasone                                                                                                                     | Fluticasone Propionate |
| 49772 | 02943020 | Fluticasone 250micrograms/dose Evohaler (Sigma<br>Pharmaceuticals Plc) Fluticasone propionate                                                                                                                | Fluticasone Propionate |
| 1412  | 75190020 | Flixotide 250microgram/actuation Inhalation powder (Allen<br>& Hanburys Ltd) Fluticasone Propionate                                                                                                          | Fluticasone Propionate |
| 43074 | 98224020 | Flixotide 500micrograms/dose Accuhaler<br>(GlaxoSmithKline UK Ltd) Fluticasone propionate<br>500microgram/1dose                                                                                              | Fluticasone Propionate |
| 56474 | 02932020 | Flixotide 125micrograms/dose Evohaler (DE<br>Pharmaceuticals)                                                                                                                                                | Fluticasone Propionate |
| 35638 | 93273020 | Fluticasone propionate 100microgram inhalation powder<br>blisters with device                                                                                                                                | Fluticasone Propionate |
| 36090 | 93281020 | Flixotide 100microgram disks (GlaxoSmithKline UK Ltd)<br>Fluticasone propionate                                                                                                                              | Fluticasone Propionate |
| 5223  | 76452020 | Fluticasone 50micrograms/dose inhaler CFC free<br>Fluticasone propionate 50microgram/1dose Pressurised<br>inhalation Inhalation Fluticasone propionate<br>50microgram/1dose Pressurised inhalation Inhalatio | Fluticasone Propionate |
| 3989  | 74454020 | Flixotide 100microgram Disc (Allen & Hanburys Ltd)<br>Fluticasone Propionate 100microgram Disc Inhalation                                                                                                    | Fluticasone Propionate |

|       |          |                                                                                                                                                                          |                        |
|-------|----------|--------------------------------------------------------------------------------------------------------------------------------------------------------------------------|------------------------|
| 3289  | 74985020 | Flixotide 25micrograms/dose inhaler (GlaxoSmithKline UK Ltd) Fluticasone propionate                                                                                      | Fluticasone Propionate |
| 5683  | 78908020 | Flixotide 250micrograms/dose Evohaler (GlaxoSmithKline UK Ltd) Fluticasone propionate                                                                                    | Fluticasone Propionate |
| 57579 | 02897020 | Flixotide 50micrograms/dose Accuhaler (DE Pharmaceuticals) Fluticasone propionate 50microgram/1dose                                                                      | Fluticasone Propionate |
| 4926  | 75192020 | Flixotide accuhaler 100 100microgram/inhalation Inhalation powder (Allen & Hanburys Ltd)                                                                                 | Fluticasone Propionate |
| 35611 | 93291020 | Flixotide 250microgram disks (GlaxoSmithKline UK Ltd) Fluticasone propionate 250microgram Inhalation powder                                                              | Fluticasone Propionate |
| 16305 | 57311020 | Flixotide 2mg/2ml Nebules (GlaxoSmithKline UK Ltd) Fluticasone propionate 1mg/1ml Nebuliser liquid Inhalation Fluticasone propionate 1mg/1ml Nebuliser liquid Inhalation | Fluticasone Propionate |
| 67237 | 02934020 | Flixotide 125micrograms/dose Evohaler (Lexon (UK) Ltd) Fluticasone propionate                                                                                            | Fluticasone Propionate |
| 5822  | 76451020 | Fluticasone 250micrograms/dose inhaler CFC free Fluticasone propionate 250microgram/1doseFluticasone propionate 250microgram/1dose                                       | Fluticasone Propionate |
| 35772 | 93275020 | Fluticasone propionate 100microgram inhalation powder blisters Fluticasone propionate                                                                                    | Fluticasone Propionate |
| 2440  | 79578020 | Flixotide accuhaler 500 500microgram/inhalation Inhalation powder (Allen & Hanburys Ltd)                                                                                 | Fluticasone Propionate |
| 5580  | 75191020 | Flixotide accuhaler 50 50microgram/inhalation Inhalation powder(Allen & Hanburys Ltd)                                                                                    | Fluticasone Propionate |
| 56475 | 02895020 | Flixotide 50micrograms/dose Accuhaler (Sigma Pharmaceuticals Plc)                                                                                                        | Fluticasone Propionate |
| 35225 | 93279020 | Flixotide 100microgram disks with Diskhaler (GlaxoSmithKline UK Ltd) Fluticasone propionate 100microgram                                                                 | Fluticasone Propionate |
| 56477 | 02898020 | Flixotide 100micrograms/dose Accuhaler (Waymade Healthcare Plc) Fluticasone propionate 100microgram/1dose Inhalation powder                                              | Fluticasone Propionate |
| 51815 | 02938020 | Flixotide 250micrograms/dose Evohaler (Waymade Healthcare Plc) Fluticasone propionate250microgram/1dose Pressurised inhalation                                           | Fluticasone Propionate |
| 2723  | 74990020 | Fluticasone 25micrograms/dose inhaler Fluticasone propionate 25microgram/1dose Pressurised inhalation Fluticasone propionate 25microgram/1dose Pressurised inhalation    | Fluticasone Propionate |



|       |          |                                                                                                                                        |                            |
|-------|----------|----------------------------------------------------------------------------------------------------------------------------------------|----------------------------|
| 67253 | 02896020 | Flixotide 50micrograms/dose Accuhaler (Mawdsley-Brooks & Company Ltd) Fluticasone propionate 50microgram/1dose                         | Fluticasone Propionate     |
| 36401 | 93285020 | Fluticasone propionate 250microgram inhalation powder blisters with device                                                             | Fluticasone Propionate     |
| 35461 | 93289020 | Flixotide 250microgram disks with Diskhaler (GlaxoSmithKline UK Ltd) Fluticasone propionate                                            | Fluticasone Propionate     |
| 7891  | 75184020 | Fluticasone 500microgram Disc Fluticasone Propionate 500microgram Disc                                                                 | Fluticasone Propionate     |
| 14294 | 88500020 | Qvar 50micrograms/dose Easi-Breathe inhaler (Teva UK Ltd) Beclometasone dipropionate                                                   | Beclometasone Dipropionate |
| 33258 | 60178020 | Beclometasone 250micrograms/dose inhaler (A A H Pharmaceuticals Ltd)                                                                   | Beclometasone Dipropionate |
| 4759  | 69249020 | Beclometasone 100microgram inhalation powder capsules Beclometasone dipropionate                                                       | Beclometasone Dipropionate |
| 2148  | 69624020 | Beclometasone 400microgram disc Beclometasone Dipropionate 400micrograms Disc Beclometasone Dipropionate 400micrograms Disc Inhalation | Beclometasone Dipropionate |
| 54399 | 10729020 | Qvar 100 Autohaler (Sigma Pharmaceuticals Plc) Beclometasone dipropionate                                                              | Beclometasone Dipropionate |
| 57589 | 02831020 | Becloforte 250micrograms/dose inhaler (Dowelhurst Ltd) Beclometasone dipropionate 250microgram/1dose                                   | Beclometasone Dipropionate |
| 31774 | 58818020 | Beclometasone 50micrograms/dose inhaler(Mylan Ltd) Beclometasone dipropionate 50microgram/1dose Pressurised inhalation                 | Beclometasone Dipropionate |
| 16148 | 91167020 | Clenil Modulite 250micrograms/dose inhaler (Chiesi Ltd) Beclometasone dipropionate 250microgram/1dose                                  | Beclometasone Dipropionate |
| 1551  | 56477020 | Beclazone 250 inhaler (Teva UK Ltd) Beclometasone dipropionate 250microgram/1dose Pressurised inhalation                               | Beclometasone Dipropionate |
| 1406  | 48324020 | Becotide 50 inhaler (GlaxoSmithKline UK Ltd)Beclometasone dipropionate 50microgram/1dose                                               | Beclometasone Dipropionate |
| 24898 | 84019020 | Spacehaler BDP 100microgram/actuation Spacehaler (Celltech Pharma Europe Ltd) Beclometasone Dipropionate 100microgram/actuation        | Beclometasone Dipropionate |
| 1242  | 69244020 | Beclometasone 250micrograms/dose inhaler Beclometasone dipropionate                                                                    | Beclometasone Dipropionate |
| 62341 | 02839020 | Becotide 50 inhaler (Dowelhurst Ltd) Beclometasone dipropionate                                                                        | Beclometasone Dipropionate |
| 1258  | 67266020 | Becotide 200 inhaler (GlaxoSmithKline UK Ltd) Beclometasone dipropionate                                                               | Beclometasone Dipropionate |

|       |          |                                                                                                                                                            |                               |
|-------|----------|------------------------------------------------------------------------------------------------------------------------------------------------------------|-------------------------------|
| 16158 | 1161020  | Clenil Modulite 50micrograms/dose inhaler (Chiesi Ltd)<br>Beclometasone dipropionate                                                                       | Beclometasone<br>Dipropionate |
| 99    | 57212020 | Becotide 100 inhaler(GlaxoSmithKline UK Ltd) Beclometh.                                                                                                    | Beclometasone<br>Dipropionate |
| 13037 | 80128020 | Pulvinal Beclometasone Dipropionate 200micrograms/dose<br>dry powder inhaler (Chiesi Ltd)                                                                  | Beclometasone<br>Dipropionate |
| 54207 | 10721020 | Qvar 50 inhaler (DE Pharmaceuticals) Beclometasone<br>dipropionate                                                                                         | Beclometasone<br>Dipropionate |
| 21005 | 91159020 | Beclometasone 250micrograms/dose inhaler CFC free<br>Beclometasone dipropionate                                                                            | Beclometasone<br>Dipropionate |
| 2160  | 74421020 | Beclometasone 50micrograms/dose breath actuated<br>inhalerBeclometasone dipropionate 50microgram/1dose                                                     | Beclometasone<br>Dipropionate |
| 67234 | 02845020 | Becotide 100 inhaler (Waymade Healthcare Plc)<br>Beclometasone dipropionateBeclometasone dipropionate                                                      | Beclometasone<br>Dipropionate |
| 14524 | 81511020 | Bdp 250microgram/actuation Spacehaler (Celltech Pharma<br>Europe Ltd) Beclometasone Dipropionate                                                           | Beclometasone<br>Dipropionate |
| 14321 | 91157020 | Beclometasone 200micrograms/dose inhaler CFC free<br>Beclometasone Dipropionate 200micrograms/actuation                                                    | Beclometasone<br>Dipropionate |
| 9477  | 85796020 | Asmabec 100microgram/actuation Spacehaler (Celltech<br>Pharma Europe Ltd) Beclometasone<br>Dipropionate100microgram/actuation SpacehalerInhalation         | Beclometasone<br>Dipropionate |
| 1951  | 68211020 | Becodisks 400microgram Disc (Allen & Hanburys Ltd)                                                                                                         | Beclometasone<br>Dipropionate |
| 51681 | 10726020 | Becodisks 400microgram Disc (Allen & Hanburys Ltd)<br>Beclometasone Dipropionate 400microgram Disc Inhalation                                              | Beclometasone<br>Dipropionate |
| 47943 | 99655020 | Beclazone easi-breathe (roi) 100microgram/actuation<br>Pressurised inhalation (Ivax Pharmaceuticals Ireland<br>Beclometasone Dipropionate                  | Beclometasone<br>Dipropionate |
| 25204 | 60177020 | Beclometasone 100micrograms/dose inhaler (A A H<br>Pharmaceuticals Ltd) Beclometasone dipropionate<br>100microgram/1dose Pressurised inhalation Inhalation | Beclometasone<br>Dipropionate |
| 4499  | 54706020 | Aerobec 250microgram/actuation Pressurised inhalation<br>(Meda Pharmaceuticals Ltd)                                                                        | Beclometasone<br>Dipropionate |
| 11732 | 86878020 | Beclometasone 50micrograms/dose breath actuated inhaler<br>CFC free                                                                                        | Beclometasone<br>Dipropionate |
| 14567 | 85881020 | Asmabec 250 Clickhaler (Focus Pharmaceuticals Ltd)<br>Beclometasone dipropionate                                                                           | Beclometasone<br>Dipropionate |
| 9577  | 85879020 | Asmabec 50 Clickhaler (Focus Pharmaceuticals Ltd)<br>Beclometasone dipropionate                                                                            | Beclometasone<br>Dipropionate |

|       |          |                                                                                                                                                                                                                                                    |                               |
|-------|----------|----------------------------------------------------------------------------------------------------------------------------------------------------------------------------------------------------------------------------------------------------|-------------------------------|
| 51415 | 10720020 | Qvar 50 inhaler (Mawdsley-Brooks & Company Ltd)<br>Beclometasone dipropionate                                                                                                                                                                      | Beclometasone<br>Dipropionate |
| 33849 | 63536020 | Beclometasone 100microgram/actuation Inhalation powder<br>(Neo Laboratories Ltd)                                                                                                                                                                   | Beclometasone<br>Dipropionate |
| 1734  | 74422020 | Beclometasone 100micrograms/dose breath actuated inhaler<br>Beclometasone dipropionate                                                                                                                                                             | Beclometasone<br>Dipropionate |
| 3743  | 48110020 | Filair 50 inhaler (Meda Pharmaceuticals Ltd)Beclometasone<br>dipropionate 50microgram/1dose Pressurised inhalation                                                                                                                                 | Beclometasone<br>Dipropionate |
| 3993  | 54871020 | Filair Forte 250micrograms/dose inhaler (Meda<br>Pharmaceuticals Ltd) Beclometasone dipropionate<br>250microgram/1dose                                                                                                                             | Beclometasone<br>Dipropionate |
| 13815 | 82720020 | Beclazone 100microgram/actuation Inhalation powder<br>(Actavis UK Ltd) Beclometasone dipropionate<br>100microgram/1dose Pressurised inhalation                                                                                                     | Beclometasone<br>Dipropionate |
| 30238 | 61523020 | Beclometasone 50microgram/actuation Pressurised<br>inhalation (Approved Prescription Services Ltd)<br>Beclometasone dipropionate 50microgram/1dose<br>Pressurised inhalation                                                                       | Beclometasone<br>Dipropionate |
| 17654 | 89688020 | Easyhaler Beclometasone 200micrograms/dose dry powder<br>inhaler (Orion Pharma (UK) Ltd) Beclometasone<br>dipropionate 200microgram/1dose                                                                                                          | Beclometasone<br>Dipropionate |
| 11198 | 81505020 | Beclometasone 50 micrograms/actuation vortex inhaler<br>Beclometasone Dipropionate 50micrograms/actuation<br>Vortex Metered Dose Inhaler Inhalation Beclometasone<br>Dipropionate 50micrograms/actuation Vortex Metered Dose<br>Inhaler Inhalation | Beclometasone<br>Dipropionate |
| 15326 | 91155020 | Beclometasone 100micrograms/dose inhaler CFC free<br>Beclometasone dipropionate 100microgram/1dose<br>Pressurised inhalation                                                                                                                       | Beclometasone<br>Dipropionate |
| 5522  | 79503020 | Beclometasone 100micrograms/dose dry powder inhaler<br>Beclometasone dipropionate 100microgram/1dose                                                                                                                                               | Beclometasone<br>Dipropionate |
| 3927  | 48111020 | Filair 100 inhaler (Meda Pharmaceuticals<br>Ltd)Beclometasone dipropionate 100microgram/1dose<br>Pressurised inhalation                                                                                                                            | Beclometasone<br>Dipropionate |
| 56493 | 10722020 | Qvar 50micrograms/dose Easi-Breathe inhaler (Sigma<br>Pharmaceuticals Plc) Beclometasone dipropionate<br>50microgram/1dose                                                                                                                         | Beclometasone<br>Dipropionate |
| 1727  | 84967020 | Becotide easi-breathe 50microgram/actuation Pressurised<br>inhalation (Allen & Hanburys Ltd)                                                                                                                                                       | Beclometasone<br>Dipropionate |

|       |          |                                                                                                                           |                               |
|-------|----------|---------------------------------------------------------------------------------------------------------------------------|-------------------------------|
| 5521  | 77000020 | Beclometasone 200micrograms/dose dry powder inhaler<br>Beclometasone dipropionate 200microgram/1dose                      | Beclometasone<br>Dipropionate |
| 3363  | 57934020 | Becloforte 400microgram disks with Diskhaler<br>(GlaxoSmithKline UK Ltd) Beclometasone dipropionate                       | Beclometasone<br>Dipropionate |
| 35580 | 93039020 | Beclometasone 100microgram inhalation powder blisters<br>with device Beclometasone dipropionate 100microgram              | Beclometasone<br>Dipropionate |
| 1885  | 81155020 | Beclazone 200 inhaler (Teva UK Ltd) Beclometasone<br>dipropionate 200microgram/1dose Pressurised inhalation<br>Inhalation | Beclometasone<br>Dipropionate |
| 16584 | 91153020 | Beclometasone 50micrograms/dose inhaler CFC free<br>Beclometasone dipropionate                                            | Beclometasone<br>Dipropionate |
| 63585 | 75217020 | Beclometasone 50micrograms/dose inhaler (Almus<br>Pharmaceuticals Ltd)                                                    | Beclometasone<br>Dipropionate |
| 9233  | 69250020 | Beclometasone 200microgram inhalation powder capsules                                                                     | Beclometasone<br>Dipropionate |
| 14757 | 80127020 | Pulvinal Beclometasone Dipropionate 100micrograms/dose<br>dry powder inhaler (Chiesi Ltd)                                 | Beclometasone<br>Dipropionate |
| 3947  | 53710020 | Becotide 100microgram Rotacaps (GlaxoSmithKline UK<br>Ltd)                                                                | Beclometasone<br>Dipropionate |
| 35288 | 93057020 | Beclometasone 400microgram inhalation powder blisters                                                                     | Beclometasone<br>Dipropionate |
| 35293 | 93047020 | Beclometasone 200microgram inhalation powder blisters<br>with device                                                      | Beclometasone<br>Dipropionate |
| 1725  | 79400020 | Beclazone 50 Easi-Breathe inhaler (Teva UK Ltd)                                                                           | Beclometasone<br>Dipropionate |
| 53480 | 10735020 | Qvar 100 Autohaler (Stephar (U.K.) Ltd) Beclometasone<br>dipropionate                                                     | Beclometasone<br>Dipropionate |
| 18848 | 88502020 | Qvar 100micrograms/dose Easi-Breathe inhaler (Teva UK<br>Ltd)                                                             | Beclometasone<br>Dipropionate |
| 2992  | 56475020 | Beclazone 50 inhaler (Teva UK Ltd)                                                                                        | Beclometasone<br>Dipropionate |
| 19389 | 85795020 | Asmabec 50microgram/actuation Spacehaler (Celltech<br>Pharma Europe Ltd)                                                  | Beclometasone<br>Dipropionate |
| 13290 | 91163020 | Clenil Modulite 100micrograms/dose inhaler (Chiesi Ltd)                                                                   | Beclometasone<br>Dipropionate |
| 34919 | 60176020 | Beclometasone 50micrograms/dose inhaler (A A H<br>Pharmaceuticals Ltd)                                                    | Beclometasone<br>Dipropionate |
| 1100  | 56476020 | Beclazone 100 inhaler (Teva UK Ltd)                                                                                       | Beclometasone<br>Dipropionate |

|       |          |                                                                                                  |                            |
|-------|----------|--------------------------------------------------------------------------------------------------|----------------------------|
| 28073 | 61525020 | Beclometasone 250microgram/actuation Pressurised inhalation (Approved Prescription Services Ltd) | Beclometasone Dipropionate |
| 2600  | 74423020 | Beclometasone 250micrograms/dose breath actuated inhaler<br>Beclometasone dipropionate           | Beclometasone Dipropionate |
| 1243  | 79402020 | Beclazone 250 Easi-Breathe inhaler (Teva UK Ltd)                                                 | Beclometasone Dipropionate |
| 35430 | 93051020 | Becodisks 200microgram with Diskhaler (GlaxoSmithKline UK Ltd)                                   | Beclometasone Dipropionate |
| 50129 | 10737020 | Qvar 100micrograms/dose Easi-Breathe inhaler (DE Pharmaceuticals)                                | Beclometasone Dipropionate |
| 41412 | 69256020 | Beclometasone 400micrograms/actuation inhaler<br>Beclometasone Dipropionate                      | Beclometasone Dipropionate |
| 41269 | 63923020 | Beclometasone 400 Cyclocaps (Teva UK Ltd)                                                        | Beclometasone Dipropionate |
| 2892  | 57935020 | Becloforte 400microgram disks (GlaxoSmithKline UK Ltd)                                           | Beclometasone Dipropionate |
| 35118 | 93059020 | Becodisks 400microgram with Diskhaler (GlaxoSmithKline UK Ltd)                                   | Beclometasone Dipropionate |
| 7964  | 63531020 | Beclometasone 50microgram/actuation Inhalation powder (Neo Laboratories Ltd)                     | Beclometasone Dipropionate |
| 9571  | 81507020 | Beclometasone 250micrograms/actuation vortex inhaler<br>Beclometasone Dipropionate               | Beclometasone Dipropionate |
| 1552  | 84970020 | Becloforte easi-breathe 250microgram/actuation Pressurised inhalation (Allen & Hanburys Ltd)     | Beclometasone Dipropionate |
| 19031 | 81510020 | Bdp 100microgram/actuation Spacehaler (Celltech Pharma Europe Ltd)                               | Beclometasone Dipropionate |
| 34794 | 65723020 | Beclometasone 200micrograms/dose inhaler (A A H Pharmaceuticals Ltd)                             | Beclometasone Dipropionate |
| 20825 | 84020020 | Spacehaler BDP 250microgram/actuation Spacehaler (Celltech Pharma Europe Ltd)                    | Beclometasone Dipropionate |
| 2229  | 68209020 | Becodisks 100microgram Disc (Allen & Hanburys Ltd)                                               | Beclometasone Dipropionate |
| 896   | 84968020 | Becotide easi-breathe 100microgram/actuation Pressurised inhalation (Allen & Hanburys Ltd)       | Beclometasone Dipropionate |
| 10090 | 86870020 | Beclometasone 50micrograms/actuation extrafine particle cfc free inhaler                         | Beclometasone Dipropionate |
| 5804  | 76999020 | Beclometasone 250micrograms/dose dry powder inhaler<br>Beclometasone dipropionate                | Beclometasone Dipropionate |
| 56471 | 02827020 | Becodisks 200microgram (Mawdsley-Brooks & Company Ltd)                                           | Beclometasone Dipropionate |

|       |          |                                                                                                           |                            |
|-------|----------|-----------------------------------------------------------------------------------------------------------|----------------------------|
| 61664 | 26859021 | Clenil Modulite 250micrograms/dose inhaler (Waymade Healthcare Plc)                                       | Beclometasone Dipropionate |
| 34739 | 67073020 | Beclometasone 50micrograms/dose inhaler (Teva UK Ltd)                                                     | Beclometasone Dipropionate |
| 48340 | 38603020 | Clenil Modulite 100micrograms/dose inhaler (Mawdsley-Brooks & Company Ltd)                                | Beclometasone Dipropionate |
| 35408 | 93045020 | Becodisks 100microgram (GlaxoSmithKline UK Ltd)                                                           | Beclometasone Dipropionate |
| 62518 | 27040021 | Beclometasone 100micrograms/dose inhaler CFC free (Ennogen Healthcare Ltd)                                | Beclometasone Dipropionate |
| 28640 | 59873020 | Beclometasone 100microgram/actuation Inhalation powder (Actavis UK Ltd)                                   | Beclometasone Dipropionate |
| 38    | 69246020 | Beclometasone 100micrograms/dose inhaler                                                                  | Beclometasone Dipropionate |
| 11497 | 77001020 | Beclometasone 400micrograms/dose dry powder inhaler                                                       | Beclometasone Dipropionate |
| 7653  | 69251020 | Beclometasone 400microgram inhalation powder capsules                                                     | Beclometasone Dipropionate |
| 29325 | 58817020 | Beclometasone 250micrograms/dose inhaler (Mylan Ltd)                                                      | Beclometasone Dipropionate |
| 21482 | 58819020 | Beclometasone 100micrograms/dose inhaler (Mylan Ltd)                                                      | Beclometasone Dipropionate |
| 35652 | 93041020 | Beclometasone 100microgram inhalation powder blisters                                                     | Beclometasone Dipropionate |
| 28761 | 84018020 | Spacehaler BDP 50microgram/actuation Spacehaler (Celltech Pharma Europe Ltd)                              | Beclometasone Dipropionate |
| 26063 | 67076020 | Beclometasone 100micrograms/dose inhaler (Teva UK Ltd)                                                    | Beclometasone Dipropionate |
| 51480 | 10736020 | Qvar 100 Autohaler (DE Pharmaceuticals)                                                                   | Beclometasone Dipropionate |
| 35107 | 93055020 | Beclometasone 400microgram inhalation powder blisters with device                                         | Beclometasone Dipropionate |
| 35071 | 93053020 | Becodisks 200microgram (GlaxoSmithKline UK Ltd)<br>Beclometasone dipropionate                             | Beclometasone Dipropionate |
| 4365  | 69622020 | Beclometasone 100micrograms disc                                                                          | Beclometasone Dipropionate |
| 39200 | 95879020 | AeroBec Forte 250 Autohaler (Meda Pharmaceuticals Ltd)                                                    | Beclometasone Dipropionate |
| 67735 | 99657020 | Beclazone easi-breathe (roi) 250microgram/actuation Pressurised inhalation (Ivax Pharmaceuticals Ireland) | Beclometasone Dipropionate |

|       |          |                                                                                                |                            |
|-------|----------|------------------------------------------------------------------------------------------------|----------------------------|
| 18394 | 81509020 | Bdp 50microgram/actuation Spacehaler (Celltech Pharma Europe Ltd)                              | Beclometasone Dipropionate |
| 34315 | 59874020 | Beclometasone 250microgram/actuation Inhalation powder (Actavis UK Ltd)                        | Beclometasone Dipropionate |
| 895   | 79401020 | Beclazone 100 Easi-Breathe inhaler (Teva UK Ltd)                                               | Beclometasone Dipropionate |
| 5992  | 79502020 | Beclometasone 50micrograms/dose dry powder inhaler                                             | Beclometasone Dipropionate |
| 3119  | 79444020 | Becloforte integra 250microgram/actuation Inhaler with compact spacer (Glaxo Laboratories Ltd) | Beclometasone Dipropionate |
| 50287 | 10725020 | Qvar 100 inhaler (DE Pharmaceuticals)                                                          | Beclometasone Dipropionate |
| 3075  | 53712020 | Becotide 400microgram Rotacaps (GlaxoSmithKline UK Ltd)                                        | Beclometasone Dipropionate |
| 67265 | 02826020 | Becodisks 200microgram (Lexon (UK) Ltd)                                                        | Beclometasone Dipropionate |
| 3018  | 69245020 | Beclometasone 50micrograms/dose inhaler                                                        | Beclometasone Dipropionate |
| 3150  | 86871020 | Beclometasone 100micrograms/actuation extrafine particle cfc free inhaler                      | Beclometasone Dipropionate |
| 19401 | 79501020 | Beclometasone 250micrograms/actuation inhaler and compact spacer                               | Beclometasone Dipropionate |
| 49367 | 38602020 | Clenil Modulite 50micrograms/dose inhaler (Mawdsley-Brooks & Company Ltd)                      | Beclometasone Dipropionate |
| 4413  | 86884020 | Qvar 100 Autohaler (Teva UK Ltd)                                                               | Beclometasone Dipropionate |
| 32874 | 59872020 | Beclometasone 50microgram/actuation Inhalation powder (Actavis UK Ltd)                         | Beclometasone Dipropionate |
| 30210 | 67080020 | Beclometasone 250micrograms/dose inhaler (Teva UK Ltd)                                         | Beclometasone Dipropionate |
| 2335  | 86874020 | Qvar 100 inhaler (Teva UK Ltd)                                                                 | Beclometasone Dipropionate |
| 46157 | 63918020 | Beclometasone 200 Cyclocaps (Teva UK Ltd)                                                      | Beclometasone Dipropionate |
| 4601  | 85880020 | Asmabec 100 Clickhaler (Focus Pharmaceuticals Ltd)                                             | Beclometasone Dipropionate |
| 16151 | 91165020 | Clenil Modulite 200micrograms/dose inhaler (Chiesi Ltd)                                        | Beclometasone Dipropionate |
| 2159  | 54705020 | AeroBec 50 Autohaler (Meda Pharmaceuticals Ltd)                                                | Beclometasone Dipropionate |

|       |          |                                                                                           |                            |
|-------|----------|-------------------------------------------------------------------------------------------|----------------------------|
| 52806 | 10732020 | Qvar 100 Autohaler (Lexon (UK) Ltd)                                                       | Beclometasone Dipropionate |
| 35106 | 93043020 | Becodisks 100microgram with Diskhaler (GlaxoSmithKline UK Ltd)                            | Beclometasone Dipropionate |
| 1537  | 53711020 | Becotide 200microgram Rotacaps (GlaxoSmithKline UK Ltd)                                   | Beclometasone Dipropionate |
| 1259  | 69255020 | Beclometasone 200micrograms/dose inhaler                                                  | Beclometasone Dipropionate |
| 9599  | 82719020 | Beclazone 50microgram/actuation Inhalation powder (Actavis UK Ltd)                        | Beclometasone Dipropionate |
| 1236  | 48309020 | Becloforte 250micrograms/dose inhaler (GlaxoSmithKline UK Ltd)                            | Beclometasone Dipropionate |
| 3546  | 86873020 | Qvar 50 inhaler (Teva UK Ltd)                                                             | Beclometasone Dipropionate |
| 35113 | 93049020 | Beclometasone 200microgram inhalation powder blisters                                     | Beclometasone Dipropionate |
| 14736 | 80129020 | Pulvinal Beclometasone Dipropionate 400micrograms/dose dry powder inhaler (Chiesi Ltd)    | Beclometasone Dipropionate |
| 8111  | 48310020 | Becloforte vm 250microgram/actuation VM pack (Allen & Hanburys Ltd)                       | Beclometasone Dipropionate |
| 3220  | 86883020 | Qvar 50 Autohaler (Teva UK Ltd)<br><br>Beclometasone dipropionate                         | Beclometasone Dipropionate |
| 883   | 68210020 | Becodisks 200microgram Disc (Allen & Hanburys Ltd)                                        | Beclometasone Dipropionate |
| 35299 | 93063020 | Becodisks 400microgram (GlaxoSmithKline UK Ltd)                                           | Beclometasone Dipropionate |
| 2893  | 69623020 | Beclometasone 200micrograms disc Beclometasone Dipropionate 200micrograms Disc Inhalation | Beclometasone Dipropionate |
| 4803  | 82721020 | Beclazone 250microgram/actuation Inhalation powder (Actavis UK Ltd)                       | Beclometasone Dipropionate |
| 56462 | 02818020 | Becodisks 400microgram (Waymade Healthcare Plc)                                           | Beclometasone Dipropionate |
| 1861  | 54707020 | AeroBec 100 Autohaler (Meda Pharmaceuticals Ltd)                                          | Beclometasone Dipropionate |
| 34859 | 63539020 | Beclometasone 250microgram/actuation Inhalation powder (Neo Laboratories Ltd)             | Beclometasone Dipropionate |
| 51234 | 10727020 | Qvar 100 inhaler (Waymade Healthcare Plc)                                                 | Beclometasone Dipropionate |



|       |          |                                                                                                                              |                            |
|-------|----------|------------------------------------------------------------------------------------------------------------------------------|----------------------------|
| 27679 | 61524020 | Beclometasone 100microgram/actuation Pressurised inhalation (Approved Prescription Services Ltd)                             | Beclometasone Dipropionate |
| 15706 | 81506020 | Beclometasone 100 micrograms/actuation vortex inhaler                                                                        | Beclometasone Dipropionate |
| 14590 | 85797020 | Asmabec 250microgram/actuation Spacehaler (Celltech Pharma Europe Ltd)                                                       | Beclometasone Dipropionate |
| 48709 | 10734020 | Qvar 100micrograms/dose Easi-Breathe inhaler (Sigma Pharmaceuticals Plc)                                                     | Beclometasone Dipropionate |
| 9921  | 86879020 | Beclometasone 100micrograms/dose breath actuated inhaler CFC free                                                            | Beclometasone Dipropionate |
| 10254 | 84120020 | Mometasone 400micrograms/dose dry powder inhaler<br>Mometasone furoate 400microgram/1dose Inhalation powder                  | Mometasone Furoate         |
| 17590 | 80362020 | Asmanex 400micrograms/dose Twisthaler (Merck Sharp & Dohme Ltd)                                                              | Mometasone Furoate         |
| 16018 | 80792020 | Mometasone 200micrograms/dose dry powder inhaler                                                                             | Mometasone Furoate         |
| 16433 | 85228020 | Asmanex 200micrograms/dose Twisthaler (Merck Sharp & Dohme Ltd)                                                              | Mometasone Furoate         |
| 21224 | 88720020 | Alvesco 80 inhaler (Takeda UK Ltd) Ciclesonide 80microgram/1dose Pressurised inhalation                                      | Ciclesonide                |
| 7356  | 88708020 | Ciclesonide 80micrograms/dose inhaler CFC free                                                                               | Ciclesonide                |
| 6839  | 88722020 | Alvesco 160 inhaler (Takeda UK Ltd)                                                                                          | Ciclesonide                |
| 10102 | 88716020 | Ciclesonide 160micrograms/dose inhaler CFC free                                                                              | Ciclesonide                |
| 60920 | 10891020 | Atrovent 20micrograms/dose inhaler CFC free (Sigma Pharmaceuticals Plc)                                                      | Ipratropium Bromide        |
| 43105 | 98206020 | Atrovent 40microgram Aerocaps with Aerohaler (Boehringer Ingelheim Ltd)                                                      | Ipratropium Bromide        |
| 3306  | 58545020 | Atrovent Forte 40micrograms/dose inhaler (Boehringer Ingelheim Ltd)                                                          | Ipratropium Bromide        |
| 43090 | 98208020 | Atrovent 40microgram Aerocaps (Boehringer Ingelheim Ltd)                                                                     | Ipratropium Bromide        |
| 1697  | 75004020 | Atrovent 20micrograms/dose Autohaler (Boehringer Ingelheim Ltd) Ipratropium bromide 20microgram/1dose Pressurised inhalation | Ipratropium Bromide        |
| 1409  | 63608020 | Ipratropium bromide 20micrograms/dose inhaler                                                                                | Ipratropium Bromide        |
| 57557 | 10892020 | Atrovent 20micrograms/dose inhaler CFC free (Lexon (UK) Ltd) Ipratropium bromide 20microgram/1dose Pressurised inhalation    | Ipratropium Bromide        |
| 2994  | 72270020 | Atrovent aerocaps 40microgram Inhalation powder (Boehringer Ingelheim Ltd)                                                   | Ipratropium Bromide        |

|       |          |                                                                                                                                                                                                        |                     |
|-------|----------|--------------------------------------------------------------------------------------------------------------------------------------------------------------------------------------------------------|---------------------|
| 23709 | 88636020 | Ipratropium 500micrograms/2ml nebuliser liquid Steri-Neb unit dose vials (Teva UK Ltd)                                                                                                                 | Ipratropium Bromide |
| 6522  | 87822020 | Ipratropium bromide 20micrograms/dose inhaler CFC free                                                                                                                                                 | Ipratropium Bromide |
| 50810 | 39925020 | Atrovent 20micrograms/dose inhaler CFC free (DE Pharmaceuticals)                                                                                                                                       | Ipratropium Bromide |
| 4268  | 63612020 | Ipratropium bromide 40micrograms/dose inhaler<br>Ipratropium bromide 40microgram/1dose Pressurised inhalation                                                                                          | Ipratropium Bromide |
| 6512  | 87824020 | Atrovent 20micrograms/dose inhaler CFC free (Boehringer Ingelheim Ltd)                                                                                                                                 | Ipratropium Bromide |
| 11779 | 72265020 | Ipratropium bromide 40microgram inhalation powder capsules with device                                                                                                                                 | Ipratropium Bromide |
| 6081  | 63609020 | Ipratropium bromide 20micrograms/dose breath actuated inhaler                                                                                                                                          | Ipratropium Bromide |
| 534   | 48252020 | Atrovent 20micrograms/dose inhaler (Boehringer Ingelheim Ltd)                                                                                                                                          | Ipratropium Bromide |
| 8333  | 72266020 | Ipratropium bromide 40microgram inhalation powder capsules                                                                                                                                             | Ipratropium Bromide |
| 9681  | 72269020 | Atrovent aerohaler 40microgram Inhalation powder (Boehringer Ingelheim Ltd) Ipratropium bromide 40microgram Inhalation powder Antimuscarinic Bronchodilators Inhalation Antimuscarinic Bronchodilators | Ipratropium Bromide |
| 6050  | 84108020 | Spiriva 18 microgram Capsule (Boehringer Ingelheim Ltd)<br>Tiotropium Bromide 18 Microgram Capsule Inhalation                                                                                          | Tiotropium Bromide  |
| 36869 | 94073020 | Spiriva Respimat 2.5micrograms/dose solution for inhalation cartridge with device (Boehringer Ingelheim Ltd)                                                                                           | Tiotropium Bromide  |
| 51967 | 21580020 | Spiriva 18microgram inhalation powder capsules (Mawdsley-Brooks & Company Ltd)                                                                                                                         | Tiotropium Bromide  |
| 35000 | 92699020 | Spiriva 18microgram inhalation powder capsules (Boehringer Ingelheim Ltd)                                                                                                                              | Tiotropium Bromide  |
| 34995 | 92697020 | Spiriva 18microgram inhalation powder capsules with HandiHaler (Boehringer Ingelheim Ltd)                                                                                                              | Tiotropium Bromide  |
| 64232 | 44715021 | Tiotropium bromide 2.5micrograms/dose solution for inhalation cartridge with device CFC free (AM Distributions (Yorkshire) Ltd)                                                                        | Tiotropium Bromide  |
| 50577 | 21583020 | Spiriva 18microgram inhalation powder capsules with HandiHaler (DE Pharmaceuticals)                                                                                                                    | Tiotropium Bromide  |
| 36864 | 94071020 | Tiotropium bromide 2.5micrograms/dose solution for inhalation cartridge with device CFC free                                                                                                           | Tiotropium Bromide  |

|       |          |                                                                                                                                                                                            |                                                          |
|-------|----------|--------------------------------------------------------------------------------------------------------------------------------------------------------------------------------------------|----------------------------------------------------------|
| 746   | 73050020 | Tiotropium 18 microgram Capsule inhalation Tiotropium Bromide 18 Microgram                                                                                                                 | Tiotropium Bromide                                       |
| 61582 | 26397021 | Spiriva Respimat 2.5micrograms/dose solution for inhalation cartridge with device (Waymade Healthcare Plc)                                                                                 | Tiotropium Bromide                                       |
| 35011 | 92695020 | Tiotropium bromide 18microgram inhalation powder capsules Tiotropium Bromide Monohydrate 18 MicrogramsInhalation Powder Capsules (refill) 18 MicrogramsInhalation Powder Capsules (refill) | Tiotropium Bromide                                       |
| 35014 | 92693020 | Tiotropium bromide 18microgram inhalation powder capsules with device Tiotropium Bromide Monohydrate 18 Micrograms Inhalation Powder Capsules With Device                                  | Tiotropium Bromide                                       |
| 2437  | 74071020 | Oxitropium bromide 100micrograms/dose inhaler Oxitropium bromide 100microgram/1dose Pressurised inhalation                                                                                 | Oxitropium Bromide                                       |
| 9658  | 74072020 | Oxitropium bromide 100micrograms/dose breath actuated inhaler                                                                                                                              | Oxitropium Bromide                                       |
| 3039  | 74069020 | Oxivent 100micrograms/dose inhaler (Boehringer Ingelheim Ltd)                                                                                                                              | Oxitropium Bromide                                       |
| 3850  | 75001020 | Oxivent 100micrograms/dose Autohaler (Boehringer Ingelheim Ltd)                                                                                                                            | Oxitropium Bromide                                       |
| 49227 | 44134020 | Aclidinium bromide 375micrograms/dose dry powder inhaler Aclidinium bromide                                                                                                                | Aclidinium Bromide                                       |
| 49228 | 44135020 | Eklira 322micrograms/dose Genuair (AstraZeneca UK Ltd) Aclidinium bromide 375microgram/1dose                                                                                               | Aclidinium Bromide                                       |
| 63992 | 44771021 | Eklira 322micrograms/dose Genuair (Waymade Healthcare Plc)                                                                                                                                 | Aclidinium bromide                                       |
| 37432 | 94307020 | Fostair 100micrograms/dose / 6micrograms/dose inhaler (Chiesi Ltd)                                                                                                                         | Beclometasone dipropionate/Formoterol fumarate dihydrate |
| 37470 | 94305020 | Beclometasone 100micrograms/dose / Formoterol 6micrograms/dose inhaler CFC free                                                                                                            | Beclometasone dipropionate/Formoterol fumarate dihydrate |
| 65894 | 60895021 | Beclometasone 200micrograms/dose / Formoterol 6micrograms/dose dry powder inhaler                                                                                                          | Beclometasone dipropionate/Formoterol fumarate dihydrate |
| 62030 | 29629021 | Beclometasone 100micrograms/dose / Formoterol 6micrograms/dose dry powder inhaler                                                                                                          | Beclometasone dipropionate/Formoterol fumarate dihydrate |

|       |          |                                                                                                            |                                                                |
|-------|----------|------------------------------------------------------------------------------------------------------------|----------------------------------------------------------------|
| 65658 | 60896021 | Fostair NEXThaler 200micrograms/dose /<br>6micrograms/dose dry powder inhaler (Chiesi Ltd)                 | Beclometasone<br>dipropionate/Formoterol<br>fumarate dihydrate |
| 61644 | 29630021 | Fostair NEXThaler 100micrograms/dose /<br>6micrograms/dose dry powder inhaler (Chiesi Ltd)                 | Beclometasone<br>dipropionate/Formoterol<br>fumarate dehydrate |
| 50739 | 14019020 | Symbicort 400/12 Turbohaler (Mawdsley-Brooks &<br>Company Ltd)                                             | Budesonide/Formoterol<br>fumarate dehydrate                    |
| 6796  | 86176020 | Budesonide 200micrograms/dose / Formoterol<br>6micrograms/dose dry powder inhaler                          | Budesonide/Formoterol<br>fumarate dihydrate                    |
| 61782 | 27233021 | DuoResp Spiromax 160micrograms/dose /<br>4.5micrograms/dose dry powder inhaler (Teva UK Ltd)               | Budesonide/Formoterol<br>fumarate dihydrate                    |
| 51759 | 00048020 | Symbicort 200/6 Turbohaler (Mawdsley-Brooks &<br>Company Ltd)                                              | Budesonide/Formoterol<br>fumarate dihydrate                    |
| 7013  | 81547020 | Symbicort 100/6 Turbohaler (AstraZeneca UK Ltd)                                                            | Budesonide/Formoterol<br>fumarate dihydrate                    |
| 68034 | 00049020 | Symbicort 200/6 Turbohaler (Necessity Supplies Ltd)                                                        | Budesonide/Formoterol<br>fumarate dehydrate                    |
| 51570 | 00046020 | Symbicort 200/6 Turbohaler (DE Pharmaceuticals)                                                            | Budesonide/Formoterol<br>fumarate dihydrate                    |
| 53491 | 00047020 | Symbicort 200/6 Turbohaler (Sigma Pharmaceuticals Plc)                                                     | Budesonide/Formoterol<br>fumarate dihydrate                    |
| 71284 | 78502021 | Fobumix Easyhaler 320micrograms/dose /<br>9micrograms/dose dry powder inhaler (Orion Pharma (UK)<br>Ltd)   | Budesonide/Formoterol<br>fumarate dihydrate                    |
| 71371 | 00050020 | Symbicort 100/6 Turbohaler (Waymade Healthcare Plc)                                                        | Budesonide/Formoterol<br>fumarate dihydrate                    |
| 71915 | 78958021 | Fobumix Easyhaler 160micrograms/dose /<br>4.5micrograms/dose dry powder inhaler (Orion Pharma<br>(UK) Ltd) | Budesonide/Formoterol<br>fumarate dihydrate                    |
| 10218 | 86175020 | Budesonide 100micrograms/dose / Formoterol<br>6micrograms/dose dry powder inhaler                          | Budesonide/Formoterol<br>fumarate dihydrate                    |
| 6325  | 81548020 | Symbicort 200/6 Turbohaler (AstraZeneca UK Ltd)                                                            | Budesonide/Formoterol<br>fumarate dihydrate                    |
| 6780  | 79213020 | Symbicort 400/12 Turbohaler (AstraZeneca UK Ltd)                                                           | Budesonide/Formoterol<br>fumarate dihydrate                    |
| 53237 | 14017020 | Symbicort 400/12 Turbohaler (DE Pharmaceuticals)                                                           | Budesonide/Formoterol<br>fumarate dihydrate                    |
| 6746  | 76616020 | Budesonide 400micrograms/dose / Formoterol<br>12micrograms/dose dry powder inhaler                         | Budesonide/Formoterol<br>fumarate dehydrate                    |

|       |          |                                                                                         |                                                      |
|-------|----------|-----------------------------------------------------------------------------------------|------------------------------------------------------|
| 50945 | 00054020 | Symbicort 100/6 Turbohaler (Mawdsley-Brooks & Company Ltd)                              | Budesonide/Formoterol fumarate dihydrate             |
| 71354 | 14020020 | Symbicort 400/12 Turbohaler (Necessity Supplies Ltd)                                    | Budesonide/Formoterol fumarate dihydrate             |
| 61666 | 27378021 | DuoResp Spiromax 320micrograms/dose / 9micrograms/dose dry powder inhaler (Teva UK Ltd) | Budesonide/Formoterol fumarate dihydrate             |
| 49114 | 00053020 | Symbicort 100/6 Turbohaler (Sigma Pharmaceuticals Plc)                                  | Budesonide/Formoterol fumarate dihydrate             |
| 51209 | 44172020 | Fluticasone 125micrograms/dose / Formoterol 5micrograms/dose inhaler CFC free           | Fluticasone propionate/Formoterol fumarate dihydrate |
| 64638 | 52509021 | Flutiform 125micrograms/dose / 5micrograms/dose inhaler (Waymade Healthcare Plc)        | Fluticasone propionate/Formoterol fumarate dihydrate |
| 48666 | 44175020 | Flutiform 250micrograms/dose / 10micrograms/dose inhaler (Napp Pharmaceuticals Ltd)     | Fluticasone propionate/Formoterol fumarate dihydrate |
| 66448 | 52510021 | Flutiform 250micrograms/dose / 10micrograms/dose inhaler (Waymade Healthcare Plc)       | Fluticasone propionate/Formoterol fumarate dihydrate |
| 68175 | 52511021 | Flutiform 50micrograms/dose / 5micrograms/dose inhaler (Waymade Healthcare Plc)         | Fluticasone propionate/Formoterol fumarate dihydrate |
| 50689 | 44177020 | Flutiform 50micrograms/dose / 5micrograms/dose inhaler (Napp Pharmaceuticals Ltd)       | Fluticasone propionate/Formoterol fumarate dihydrate |
| 51270 | 44176020 | Fluticasone 50micrograms/dose / Formoterol 5micrograms/dose inhaler CFC free            | Fluticasone propionate/Formoterol fumarate dehydrate |
| 50036 | 44173020 | Flutiform 125micrograms/dose / 5micrograms/dose inhaler (Napp Pharmaceuticals Ltd)      | Fluticasone propionate/Formoterol fumarate dihydrate |
| 49868 | 44174020 | Fluticasone 250micrograms/dose / Formoterol 10micrograms/dose inhaler CFC free          | Fluticasone propionate/Formoterol fumarate dihydrate |
| 51394 | 02760020 | Seretide 500 Accuhaler (Waymade Healthcare Plc)                                         | Salmeterol xinafoate/Fluticasone propionate          |

|       |          |                                                                                                                               |                                                       |
|-------|----------|-------------------------------------------------------------------------------------------------------------------------------|-------------------------------------------------------|
| 6616  | 86896020 | Salmeterol 25micrograms with fluticasone 50micrograms<br>CFC free inhaler                                                     | Salmeterol<br>Xinafoate/Fluticasone<br>Propionate     |
| 5942  | 85657020 | Salmeterol 50micrograms with fluticasone 250micrograms<br>CFC free inhaler                                                    | Salmeterol<br>Xinafoate/Fluticasone<br>Propionate     |
| 67101 | 60670021 | Fluticasone propionate 500micrograms/dose / Salmeterol<br>50micrograms/dose dry powder inhaler (A A H<br>Pharmaceuticals Ltd) | Salmeterol<br>xinafoate/Fluticasone<br>propionate     |
| 13273 | 85660020 | Fluticasone propionate 100micrograms/dose / Salmeterol<br>50micrograms/dose dry powder inhaler                                | Salmeterol<br>xinafoate/Fluticasone<br>propionate     |
| 5864  | 86898020 | Salmeterol 25micrograms with fluticasone 250micrograms<br>CFC free inhaler                                                    | Salmeterol<br>Xinafoate/Fluticasone<br>Propionate     |
| 51861 | 02764020 | Seretide 500 Accuhaler (Mawdsley-Brooks & Company<br>Ltd)                                                                     | Salmeterol<br>xinafoate/Fluticasone<br>propionate     |
| 53230 | 02755020 | Seretide 250 Accuhaler (DE Pharmaceuticals)                                                                                   | Salmeterol<br>xinafoate/Fluticasone<br>propionate     |
| 11410 | 85662020 | Fluticasone propionate 500micrograms/dose / Salmeterol<br>50micrograms/dose dry powder inhaler                                | Salmeterol<br>xinafoate/Fluticasone<br>propionate     |
| 61280 | 02753020 | Seretide 250 Accuhaler (Waymade Healthcare Plc)                                                                               | Salmeterol<br>xinafoate/Fluticasone<br>propionate     |
| 6938  | 85656020 | Salmeterol 50micrograms with fluticasone 100micrograms<br>dry powder inhaler                                                  | Salmeterol<br>Xinafoate/Fluticasone<br>Propionate     |
| 62126 | 02747020 | Seretide 100 Accuhaler (DE Pharmaceuticals)                                                                                   | Salmeterol<br>xinafoate/Fluticasone<br>propionate     |
| 68983 | 71438021 | Aerivio Spiromax 50micrograms/dose /<br>500micrograms/dose dry powder inhaler (Teva UK Ltd)                                   | Salmeterol<br>xinafoate/Fluticasone<br>propionate3666 |
| 5558  | 85658020 | Salmeterol 50micrograms with fluticasone 500micrograms<br>CFC free inhaler                                                    | Salmeterol<br>Xinafoate/Fluticasone<br>Propionate     |

|       |          |                                                                                                   |                                             |
|-------|----------|---------------------------------------------------------------------------------------------------|---------------------------------------------|
| 55677 | 02763020 | Seretide 500 Accuhaler (Lexon (UK) Ltd)                                                           | Salmeterol xinafoate/Fluticasone propionate |
| 13040 | 85661020 | Fluticasone propionate 250micrograms/dose / Salmeterol 50micrograms/dose dry powder inhaler       | Salmeterol xinafoate/Fluticasone propionate |
| 6569  | 86897020 | Salmeterol 25micrograms with fluticasone 125micrograms CFC free inhaler                           | Salmeterol Xinafoate/Fluticasone Propionate |
| 638   | 79544020 | Seretide 250 Accuhaler (GlaxoSmithKline UK Ltd)                                                   | Salmeterol xinafoate/Fluticasone propionate |
| 665   | 85668020 | Seretide 100 Accuhaler (GlaxoSmithKline UK Ltd)                                                   | Salmeterol xinafoate/Fluticasone propionate |
| 63945 | 02757020 | Seretide 250 Accuhaler (Lexon (UK) Ltd)                                                           | Salmeterol xinafoate/Fluticasone propionate |
| 68495 | 02765020 | Seretide 500 Accuhaler (Necessity Supplies Ltd)                                                   | Salmeterol xinafoate/Fluticasone propionate |
| 51593 | 02766020 | Seretide 500 Accuhaler (DE Pharmaceuticals)                                                       | Salmeterol xinafoate/Fluticasone propionate |
| 53283 | 02745020 | Seretide 100 Accuhaler (Waymade Healthcare Plc)                                                   | Salmeterol xinafoate/Fluticasone propionate |
| 50560 | 02756020 | Seretide 250 Accuhaler (Sigma Pharmaceuticals Plc)                                                | Salmeterol xinafoate/Fluticasone propionate |
| 59899 | 21595021 | Fluticasone furoate 184micrograms/dose / Vilanterol 22micrograms/dose dry powder inhaler          | Fluticasone furoate/Vilanterol              |
| 59327 | 21598021 | Relvar Ellipta 92micrograms/dose / 22micrograms/dose dry powder inhaler (GlaxoSmithKline UK Ltd)  | Fluticasone furoate/Vilanterol              |
| 59439 | 21597021 | Fluticasone furoate 92micrograms/dose / Vilanterol 22micrograms/dose dry powder inhaler           | Fluticasone furoate/Vilanterol              |
| 59573 | 21596021 | Relvar Ellipta 184micrograms/dose / 22micrograms/dose dry powder inhaler (GlaxoSmithKline UK Ltd) | Fluticasone furoate/Vilanterol              |

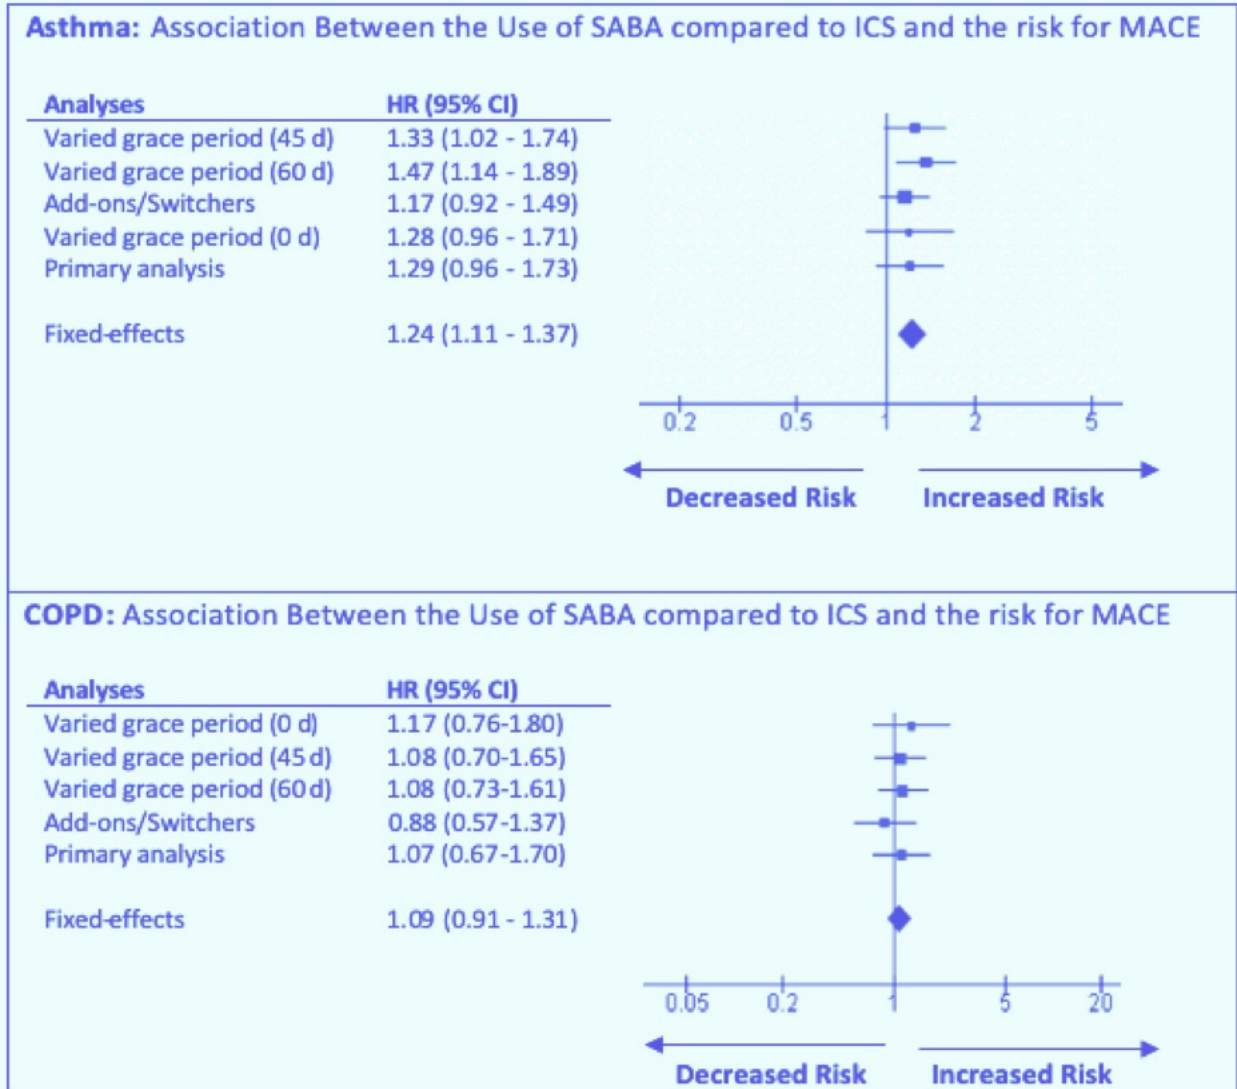

**Appendix 2:** Sensitivity Analyses for the Association Between the Use of SABA compared to ICS and the risk for Major Adverse Cardiovascular Event.

**Abbreviations:** COPD, chronic obstructive pulmonary disease; ICS, inhaled corticosteroid; SABA, short-acting beta-agonist; MACE, major adverse cardiovascular event; HR, hazard ratio
